# Supplementary material for: An atlas of dynamic chromatin landscapes in mouse fetal development
Source: Nature. 2020 Jul 29;583(7818):744–51. doi: 10.1038/s41586-020-2093-3 (PMC7398618; doi:10.1038/s41586-020-2093-3)
Supplement: Supplementary file 5 — This file contains d-TAC human orthologous regions. [file 41586_2020_2093_MOESM5_ESM.xlsx]

## Sheet: dTAC_catalog.hg19_mapped
chromosome	start	end	name	previously annotated in human?
chr1	564984	565056	Peak_37711	Yes
chr1	566034	566236	Peak_383763	Yes
chr1	566752	566880	Peak_383764	Yes
chr1	567338	567495	Peak_383765	Yes
chr1	874282	874494	Peak_368413	Yes
chr1	878044	878155	Peak_368410	Yes
chr1	916007	916425	Peak_368402	Yes
chr1	956512	956710	Peak_368392	Yes
chr1	959848	960273	Peak_368391	Yes
chr1	960449	961279	Peak_368390	Yes
chr1	977653	977800	Peak_368383	Yes
chr1	979199	979275	Peak_368382	No
chr1	990174	990345	Peak_368377	No
chr1	1026823	1027041	Peak_368368	Yes
chr1	1065885	1066165	Peak_368351	Yes
chr1	1086182	1086360	Peak_368344	No
chr1	1099051	1099149	Peak_368339	Yes
chr1	1115103	1115383	Peak_368332	Yes
chr1	1146747	1146883	Peak_368325	Yes
chr1	1148785	1148916	Peak_368322	Yes
chr1	1226183	1226289	Peak_368306	Yes
chr1	1227885	1228071	Peak_368304	Yes
chr1	1228227	1228322	Peak_368303	Yes
chr1	1229826	1229922	Peak_368301	Yes
chr1	1230020	1230149	Peak_368300	Yes
chr1	1269003	1269086	Peak_368291	Yes
chr1	1272623	1273240	Peak_368289	Yes
chr1	1274695	1274778	Peak_368287	No
chr1	1322259	1322831	Peak_368276	Yes
chr1	1325577	1325716	Peak_368275	Yes
chr1	1328797	1329197	Peak_368274	Yes
chr1	1354731	1354828	Peak_368269	Yes
chr1	1355413	1357211	Peak_368268	Yes
chr1	1369681	1370414	Peak_368259	Yes
chr1	1370649	1371449	Peak_368258	Yes
chr1	1470573	1470879	Peak_368247	Yes
chr1	1533798	1533898	Peak_368239	Yes
chr1	1534139	1534301	Peak_368238	Yes
chr1	1566882	1567861	Peak_368229	Yes
chr1	1568804	1569307	Peak_368228	No
chr1	1718384	1718463	Peak_162963	Yes
chr1	1763714	1763880	Peak_368191	Yes
chr1	1819888	1820297	Peak_368185	Yes
chr1	1861621	1861712	Peak_368173	Yes
chr1	1959569	1959648	Peak_368166	Yes
chr1	1960932	1961046	Peak_368165	Yes
chr1	1987644	1988035	Peak_368157	Yes
chr1	1990919	1991037	Peak_368155	Yes
chr1	2058782	2058964	Peak_368139	Yes
chr1	2075310	2075599	Peak_368134	Yes
chr1	2139682	2140087	Peak_368112	Yes
chr1	2162282	2162439	Peak_368107	Yes
chr1	2168260	2169082	Peak_368105	Yes
chr1	2185799	2186092	Peak_368096	Yes
chr1	2198379	2198849	Peak_368090	Yes
chr1	2218589	2218681	Peak_368080	Yes
chr1	2283786	2284050	Peak_368053	Yes
chr1	2325082	2325222	Peak_368044	Yes
chr1	2358041	2358408	Peak_368034	Yes
chr1	2358548	2358631	Peak_368033	Yes
chr1	2360889	2361206	Peak_368030	Yes
chr1	2361481	2362918	Peak_368029	Yes
chr1	2391512	2392346	Peak_368017	Yes
chr1	2392357	2392680	Peak_368016	Yes
chr1	2400786	2401082	Peak_368014	Yes
chr1	2402754	2403054	Peak_368013	Yes
chr1	2404569	2404981	Peak_368012	Yes
chr1	2407517	2407836	Peak_368010	Yes
chr1	2418993	2419076	Peak_368004	Yes
chr1	2428132	2428269	Peak_368001	Yes
chr1	2434023	2434604	Peak_368000	Yes
chr1	2436485	2436592	Peak_367998	Yes
chr1	2446972	2447155	Peak_367994	Yes
chr1	2456335	2456515	Peak_367992	Yes
chr1	2456629	2458487	Peak_367991	Yes
chr1	2461365	2462232	Peak_367989	Yes
chr1	2464281	2464767	Peak_367987	Yes
chr1	2475201	2475434	Peak_367985	Yes
chr1	2489174	2489492	Peak_367975	Yes
chr1	2535407	2535717	Peak_367962	Yes
chr1	2542644	2543451	Peak_367959	Yes
chr1	2543687	2543794	Peak_367958	Yes
chr1	2716276	2717122	Peak_367952	Yes
chr1	2723184	2723533	Peak_367950	Yes
chr1	2749835	2749954	Peak_367941	Yes
chr1	2771818	2772776	Peak_367939	Yes
chr1	2773600	2774362	Peak_367938	Yes
chr1	2784680	2785222	Peak_367932	Yes
chr1	2794940	2795827	Peak_367929	Yes
chr1	2809003	2809116	Peak_367921	Yes
chr1	2827848	2828457	Peak_367915	Yes
chr1	2831320	2831607	Peak_367914	Yes
chr1	2836298	2836968	Peak_367912	Yes
chr1	2837097	2837461	Peak_367911	Yes
chr1	2845964	2846089	Peak_367908	Yes
chr1	2850080	2850345	Peak_367907	Yes
chr1	2850408	2850695	Peak_367906	Yes
chr1	2858891	2859396	Peak_367904	Yes
chr1	2863994	2864367	Peak_367902	Yes
chr1	2864468	2864715	Peak_367901	Yes
chr1	2882358	2882449	Peak_367896	No
chr1	2886643	2886857	Peak_367893	Yes
chr1	2896707	2897536	Peak_367892	Yes
chr1	2899581	2900001	Peak_367890	Yes
chr1	2901871	2902163	Peak_367888	Yes
chr1	2903456	2903624	Peak_367887	Yes
chr1	2904146	2904881	Peak_367886	Yes
chr1	2928590	2928705	Peak_367883	Yes
chr1	2933708	2933822	Peak_367879	Yes
chr1	2948396	2948544	Peak_367876	Yes
chr1	2948555	2948637	Peak_367875	Yes
chr1	2980467	2980584	Peak_367865	Yes
chr1	2982893	2983103	Peak_367864	Yes
chr1	2983609	2984133	Peak_367863	Yes
chr1	2985291	2987263	Peak_367861	Yes
chr1	2989635	2989827	Peak_367859	Yes
chr1	2991491	2991769	Peak_367857	Yes
chr1	2995178	2995299	Peak_367854	Yes
chr1	2997091	2997300	Peak_367851	Yes
chr1	2999821	3000051	Peak_367850	Yes
chr1	3000779	3000886	Peak_367849	Yes
chr1	3024399	3024476	Peak_367841	No
chr1	3041390	3041735	Peak_367829	Yes
chr1	3042034	3043138	Peak_367827	Yes
chr1	3043736	3043883	Peak_367826	Yes
chr1	3043908	3043998	Peak_367825	Yes
chr1	3044056	3044186	Peak_367824	Yes
chr1	3051372	3052427	Peak_367822	Yes
chr1	3057843	3058044	Peak_367818	Yes
chr1	3070294	3070390	Peak_367812	Yes
chr1	3070466	3071046	Peak_367811	Yes
chr1	3081110	3081378	Peak_367807	Yes
chr1	3083997	3085056	Peak_367806	Yes
chr1	3086292	3086563	Peak_367804	Yes
chr1	3087054	3088112	Peak_367802	Yes
chr1	3102754	3103069	Peak_367796	Yes
chr1	3114356	3114611	Peak_367787	Yes
chr1	3120354	3120651	Peak_367785	Yes
chr1	3121376	3121926	Peak_367784	Yes
chr1	3128140	3128917	Peak_367779	Yes
chr1	3130351	3130579	Peak_367778	Yes
chr1	3134950	3135129	Peak_367774	Yes
chr1	3135502	3136311	Peak_367773	Yes
chr1	3136541	3136689	Peak_367772	Yes
chr1	3143242	3143835	Peak_367767	Yes
chr1	3143905	3144400	Peak_367766	Yes
chr1	3148197	3148286	Peak_367765	Yes
chr1	3153125	3153280	Peak_367762	Yes
chr1	3155209	3155293	Peak_367759	Yes
chr1	3165392	3165881	Peak_367755	Yes
chr1	3166178	3167287	Peak_367754	Yes
chr1	3191152	3191287	Peak_367748	Yes
chr1	3201941	3202046	Peak_367742	Yes
chr1	3208584	3209382	Peak_367740	Yes
chr1	3212394	3212545	Peak_367738	Yes
chr1	3226898	3226993	Peak_367732	Yes
chr1	3229194	3229296	Peak_367731	Yes
chr1	3229417	3229567	Peak_367730	Yes
chr1	3230122	3230561	Peak_367728	Yes
chr1	3235870	3236215	Peak_367725	Yes
chr1	3240156	3240523	Peak_367720	Yes
chr1	3261904	3262707	Peak_367711	Yes
chr1	3264513	3266557	Peak_367710	Yes
chr1	3276679	3276783	Peak_367705	Yes
chr1	3277395	3277628	Peak_367704	Yes
chr1	3289175	3289825	Peak_367701	Yes
chr1	3315035	3315214	Peak_367693	Yes
chr1	3331733	3332389	Peak_367690	Yes
chr1	3336074	3336514	Peak_367686	Yes
chr1	3337803	3338383	Peak_367685	Yes
chr1	3347595	3347872	Peak_367680	Yes
chr1	3349762	3350373	Peak_367679	Yes
chr1	3350930	3351235	Peak_367678	Yes
chr1	3357719	3358846	Peak_367674	Yes
chr1	3384761	3384916	Peak_367666	Yes
chr1	3386323	3386532	Peak_367664	No
chr1	3388135	3388341	Peak_367663	Yes
chr1	3388588	3388802	Peak_367662	Yes
chr1	3396464	3396607	Peak_367660	Yes
chr1	3427264	3427434	Peak_367654	Yes
chr1	3433922	3434269	Peak_367651	Yes
chr1	3479076	3479476	Peak_367631	Yes
chr1	3482559	3482814	Peak_367628	Yes
chr1	3489988	3490362	Peak_367626	Yes
chr1	3496089	3496366	Peak_367623	No
chr1	3514757	3515172	Peak_367617	Yes
chr1	3541628	3542322	Peak_446060	Yes
chr1	3552456	3552564	Peak_367610	No
chr1	3565976	3567052	Peak_367607	Yes
chr1	3585169	3585283	Peak_367598	Yes
chr1	3607083	3607223	Peak_367593	Yes
chr1	3607346	3607425	Peak_367592	Yes
chr1	3607990	3608064	Peak_367591	Yes
chr1	3615676	3615836	Peak_367589	Yes
chr1	3624110	3624789	Peak_367588	Yes
chr1	3639945	3640092	Peak_367584	Yes
chr1	3650585	3651272	Peak_367582	Yes
chr1	3652604	3652676	Peak_367581	Yes
chr1	3679149	3679406	Peak_367576	Yes
chr1	3679518	3679717	Peak_367575	Yes
chr1	3690431	3690595	Peak_367571	Yes
chr1	3747757	3747836	Peak_367557	Yes
chr1	3807266	3807484	Peak_262036,Peak_79709	Yes
chr1	3822772	3822900	Peak_367547	Yes
chr1	3828998	3829312	Peak_367539	Yes
chr1	4053680	4053941	Peak_367528	Yes
chr1	4076788	4076879	Peak_367521	Yes
chr1	4128680	4129313	Peak_367517	Yes
chr1	4134230	4134405	Peak_367516	Yes
chr1	4193152	4193354	Peak_367511	Yes
chr1	4194384	4194545	Peak_367508	Yes
chr1	4273758	4273888	Peak_367499	Yes
chr1	4294178	4294622	Peak_367495	Yes
chr1	4327833	4328025	Peak_367488	Yes
chr1	4330199	4330366	Peak_367487	Yes
chr1	4338216	4338383	Peak_367484	No
chr1	4338523	4338840	Peak_367483	Yes
chr1	4397148	4397615	Peak_367477	Yes
chr1	4405607	4405793	Peak_367474	Yes
chr1	4419382	4420563	Peak_367471	Yes
chr1	4430202	4430689	Peak_367470	Yes
chr1	4461217	4461383	Peak_367468	No
chr1	4462321	4462894	Peak_367467	Yes
chr1	4505791	4505959	Peak_367461	No
chr1	4508602	4508711	Peak_367457	Yes
chr1	4555621	4555842	Peak_367448	Yes
chr1	4561240	4561342	Peak_367446	Yes
chr1	4562018	4562520	Peak_367445	Yes
chr1	4565095	4565329	Peak_367444	No
chr1	4572015	4572121	Peak_367442	No
chr1	4589976	4590536	Peak_367438	Yes
chr1	4592710	4593128	Peak_367437	Yes
chr1	4593518	4593603	Peak_367436	No
chr1	4598416	4598632	Peak_367433	No
chr1	4605635	4605709	Peak_367432	Yes
chr1	4605843	4606152	Peak_367431	No
chr1	4633337	4633599	Peak_367418	Yes
chr1	4644535	4644899	Peak_367415	Yes
chr1	4697581	4697839	Peak_367408	Yes
chr1	4712707	4713042	Peak_367407	Yes
chr1	4713979	4715097	Peak_367406	Yes
chr1	4715105	4715432	Peak_367405	Yes
chr1	4716143	4716238	Peak_367403	Yes
chr1	4716350	4716893	Peak_367402	Yes
chr1	4759944	4760440	Peak_367393	Yes
chr1	4761028	4761221	Peak_367392	Yes
chr1	4815997	4816204	Peak_367383	Yes
chr1	4832821	4832985	Peak_367377	Yes
chr1	4835800	4835920	Peak_367376	Yes
chr1	4847810	4848362	Peak_367372	Yes
chr1	4910789	4911077	Peak_367365	Yes
chr1	4911130	4911355	Peak_367364	Yes
chr1	4932846	4933016	Peak_367357	No
chr1	4957272	4957425	Peak_367352	No
chr1	4968263	4969046	Peak_367349	Yes
chr1	4971022	4971367	Peak_367347	Yes
chr1	4973424	4973570	Peak_367344	Yes
chr1	4976072	4976658	Peak_367342	Yes
chr1	4981032	4981121	Peak_367340	Yes
chr1	4997317	4997426	Peak_367335	Yes
chr1	5000518	5000658	Peak_367333	Yes
chr1	5006931	5007096	Peak_367330	Yes
chr1	5008242	5008316	Peak_367329	Yes
chr1	5012628	5012701	Peak_367328	No
chr1	5046666	5047416	Peak_367310	Yes
chr1	5076201	5076490	Peak_367302	Yes
chr1	5127731	5127877	Peak_367296	Yes
chr1	5147204	5147340	Peak_367292	No
chr1	5195448	5195541	Peak_367285	No
chr1	5225974	5228157	Peak_367277	Yes
chr1	5234231	5234362	Peak_367275	Yes
chr1	5237165	5237240	Peak_367273	No
chr1	5244794	5245560	Peak_367272	Yes
chr1	5280186	5280343	Peak_367267	Yes
chr1	5295847	5295936	Peak_367264	Yes
chr1	5299339	5299533	Peak_367262	Yes
chr1	5312471	5312663	Peak_367256	Yes
chr1	5325516	5325605	Peak_367252	Yes
chr1	5347660	5348024	Peak_367248	Yes
chr1	5364706	5365242	Peak_367246	Yes
chr1	5398635	5398753	Peak_367237	Yes
chr1	5409696	5410222	Peak_367232	Yes
chr1	5438585	5439058	Peak_367224	No
chr1	5449328	5449582	Peak_367219	Yes
chr1	5459661	5460091	Peak_367218	Yes
chr1	5478579	5478838	Peak_367210	Yes
chr1	5486368	5487033	Peak_367207	Yes
chr1	5546481	5546746	Peak_367200	Yes
chr1	5546828	5546905	Peak_367199	Yes
chr1	5553248	5553969	Peak_367198	Yes
chr1	5562267	5562433	Peak_367197	Yes
chr1	5625531	5625818	Peak_367186	Yes
chr1	5673852	5674253	Peak_367183	Yes
chr1	5680077	5680225	Peak_367181	No
chr1	5683197	5683360	Peak_367178	Yes
chr1	5683476	5683800	Peak_367177	Yes
chr1	5710749	5711286	Peak_367174	Yes
chr1	5718426	5718546	Peak_367172	Yes
chr1	5725302	5725462	Peak_367171	Yes
chr1	5725642	5726115	Peak_367170	Yes
chr1	5726551	5727164	Peak_367169	Yes
chr1	5812211	5812291	Peak_367152	Yes
chr1	5812451	5812734	Peak_367151	Yes
chr1	5816890	5816970	Peak_367150	Yes
chr1	5819044	5819133	Peak_367149	Yes
chr1	5824409	5824488	Peak_367147	Yes
chr1	5826221	5826353	Peak_367146	Yes
chr1	5856019	5856106	Peak_146247	Yes
chr1	5888581	5888897	Peak_367139	Yes
chr1	5902899	5903072	Peak_367135	Yes
chr1	5937250	5937362	Peak_367129	Yes
chr1	5951480	5951666	Peak_367125	Yes
chr1	5964831	5965006	Peak_367123	Yes
chr1	5975780	5976445	Peak_367120	Yes
chr1	5987770	5987923	Peak_367117	No
chr1	5993443	5993655	Peak_367113	Yes
chr1	6030630	6031036	Peak_367108	Yes
chr1	6036114	6036477	Peak_367104	Yes
chr1	6046204	6046379	Peak_367103	Yes
chr1	6051532	6053656	Peak_367101	Yes
chr1	6058879	6058950	Peak_367100	Yes
chr1	6061326	6061722	Peak_367097	Yes
chr1	6081607	6081685	Peak_341070	Yes
chr1	6082155	6082266	Peak_341071	Yes
chr1	6094964	6095144	Peak_367087	Yes
chr1	6099585	6099734	Peak_367086	Yes
chr1	6108730	6108854	Peak_367082	Yes
chr1	6140338	6140488	Peak_367075	Yes
chr1	6142499	6143117	Peak_367074	Yes
chr1	6143122	6143980	Peak_367073	Yes
chr1	6154432	6154536	Peak_367069	Yes
chr1	6159256	6159584	Peak_367065	Yes
chr1	6183817	6184131	Peak_367063	Yes
chr1	6184379	6184588	Peak_367062	Yes
chr1	6204328	6204537	Peak_367057	Yes
chr1	6204643	6205183	Peak_367056	Yes
chr1	6236480	6236563	Peak_367046	Yes
chr1	6237010	6237398	Peak_367045	Yes
chr1	6238647	6240099	Peak_367044	Yes
chr1	6240140	6240813	Peak_367043	Yes
chr1	6240933	6241092	Peak_367042	Yes
chr1	6246326	6246495	Peak_367040	No
chr1	6266646	6266723	Peak_367036	Yes
chr1	6267051	6267566	Peak_367035	Yes
chr1	6269488	6269587	Peak_367033	Yes
chr1	6270677	6271490	Peak_367031	Yes
chr1	6271818	6271978	Peak_367030	Yes
chr1	6272038	6272433	Peak_367029	Yes
chr1	6278940	6279046	Peak_367028	Yes
chr1	6284743	6285132	Peak_367026	Yes
chr1	6300325	6300541	Peak_367023	Yes
chr1	6305207	6305422	Peak_367020	Yes
chr1	6306850	6307117	Peak_367018	Yes
chr1	6309090	6310193	Peak_367017	Yes
chr1	6314490	6314733	Peak_367016	No
chr1	6320060	6321930	Peak_367014	Yes
chr1	6330001	6330455	Peak_367011	Yes
chr1	6331031	6331264	Peak_367010	Yes
chr1	6363003	6363211	Peak_367003	Yes
chr1	6389577	6390763	Peak_366990	Yes
chr1	6393822	6394237	Peak_366989	Yes
chr1	6478089	6479166	Peak_366962	Yes
chr1	6483349	6484123	Peak_366955	Yes
chr1	6484556	6485657	Peak_366954	Yes
chr1	6489649	6491258	Peak_366953	Yes
chr1	6497069	6497411	Peak_366952	Yes
chr1	6506818	6507032	Peak_366949	Yes
chr1	6507520	6507783	Peak_366947	Yes
chr1	6511020	6511505	Peak_366945	Yes
chr1	6511774	6512008	Peak_366944	Yes
chr1	6519882	6520016	Peak_366942	Yes
chr1	6521006	6521167	Peak_366941	Yes
chr1	6521473	6521618	Peak_366939	Yes
chr1	6521686	6521971	Peak_366938	Yes
chr1	6524672	6524938	Peak_366936	Yes
chr1	6532030	6532722	Peak_366931	Yes
chr1	6535693	6535846	Peak_366930	Yes
chr1	6543519	6544162	Peak_366927	Yes
chr1	6549003	6549861	Peak_366924	Yes
chr1	6555158	6555915	Peak_366922	Yes
chr1	6556067	6556259	Peak_366921	Yes
chr1	6570757	6571419	Peak_366912	Yes
chr1	6615122	6615608	Peak_366906	Yes
chr1	6646464	6646663	Peak_366902	Yes
chr1	6647348	6647804	Peak_366900	Yes
chr1	6659123	6659206	Peak_514726	Yes
chr1	6660644	6661719	Peak_366894	Yes
chr1	6661748	6663469	Peak_366893	Yes
chr1	6663534	6663833	Peak_366892	Yes
chr1	6664317	6664555	Peak_366891	Yes
chr1	6672799	6674965	Peak_366888	Yes
chr1	6675023	6675292	Peak_366887	Yes
chr1	6687187	6687308	Peak_366885	Yes
chr1	6695363	6695615	Peak_366881	Yes
chr1	6713460	6713631	Peak_366877	Yes
chr1	6713680	6714022	Peak_366876	Yes
chr1	6727237	6727633	Peak_366868	Yes
chr1	6746816	6747085	Peak_366859	Yes
chr1	6784538	6784764	Peak_366851	Yes
chr1	6792025	6792413	Peak_366847	Yes
chr1	6807069	6807429	Peak_366840	Yes
chr1	6815816	6816356	Peak_366838	Yes
chr1	6830776	6831459	Peak_366835	Yes
chr1	6844395	6845869	Peak_366834	Yes
chr1	6846113	6846256	Peak_366833	Yes
chr1	6880559	6880656	Peak_366829	Yes
chr1	6882003	6882262	Peak_366827	Yes
chr1	6893924	6894235	Peak_366826	Yes
chr1	6904914	6905024	Peak_366822	Yes
chr1	6926176	6926294	Peak_366817	No
chr1	6930316	6930439	Peak_366815	Yes
chr1	6930717	6930855	Peak_366814	Yes
chr1	6934476	6934629	Peak_366813	Yes
chr1	6935059	6935194	Peak_366812	Yes
chr1	6937927	6938601	Peak_366811	Yes
chr1	6946592	6946801	Peak_366808	Yes
chr1	6947034	6947182	Peak_366807	No
chr1	6951545	6951764	Peak_366806	Yes
chr1	6954978	6955290	Peak_366805	Yes
chr1	6955937	6956193	Peak_366803	Yes
chr1	6956364	6956689	Peak_366802	Yes
chr1	6959408	6959488	Peak_366801	Yes
chr1	6959540	6959667	Peak_366800	Yes
chr1	6966289	6966801	Peak_366797	Yes
chr1	6967539	6967686	Peak_366796	Yes
chr1	6968739	6968900	Peak_366794	Yes
chr1	6976275	6976631	Peak_366791	Yes
chr1	6977301	6977514	Peak_366790	Yes
chr1	6984561	6984863	Peak_366788	Yes
chr1	6988470	6988739	Peak_366787	Yes
chr1	6995464	6996304	Peak_366783	Yes
chr1	6997114	6997363	Peak_366781	Yes
chr1	7013204	7013286	Peak_366772	Yes
chr1	7019118	7019317	Peak_366768	Yes
chr1	7020147	7020903	Peak_366766	Yes
chr1	7027620	7027695	Peak_366763	Yes
chr1	7028456	7028712	Peak_366762	Yes
chr1	7039270	7039439	Peak_366757	Yes
chr1	7042285	7042470	Peak_366756	Yes
chr1	7045692	7046055	Peak_366754	Yes
chr1	7046576	7048774	Peak_366753	Yes
chr1	7049219	7049311	Peak_366752	Yes
chr1	7051138	7051290	Peak_366751	Yes
chr1	7067346	7067494	Peak_366747	Yes
chr1	7073856	7074692	Peak_366741	Yes
chr1	7078554	7078705	Peak_366740	Yes
chr1	7081879	7081972	Peak_366737	Yes
chr1	7087613	7087689	Peak_366735	Yes
chr1	7097343	7097596	Peak_366734	Yes
chr1	7102617	7103043	Peak_366733	Yes
chr1	7103097	7103291	Peak_366732	Yes
chr1	7103792	7104020	Peak_366731	Yes
chr1	7104186	7104864	Peak_366730	Yes
chr1	7106471	7106742	Peak_366728	Yes
chr1	7115565	7115756	Peak_366724	Yes
chr1	7116573	7117022	Peak_366723	Yes
chr1	7131902	7132023	Peak_366719	No
chr1	7143135	7143255	Peak_366714	Yes
chr1	7151436	7151706	Peak_366711	Yes
chr1	7157349	7157468	Peak_366710	Yes
chr1	7165038	7165127	Peak_366707	Yes
chr1	7166396	7166629	Peak_366706	Yes
chr1	7169837	7170101	Peak_366705	Yes
chr1	7170493	7170701	Peak_366704	Yes
chr1	7184749	7184848	Peak_366701	Yes
chr1	7187719	7188579	Peak_366699	Yes
chr1	7189765	7189846	Peak_366698	No
chr1	7210818	7211750	Peak_366691	Yes
chr1	7232849	7233429	Peak_366683	Yes
chr1	7234174	7234351	Peak_366682	Yes
chr1	7267579	7267774	Peak_366674	Yes
chr1	7268604	7269885	Peak_366673	Yes
chr1	7281925	7282189	Peak_366670	Yes
chr1	7282272	7282562	Peak_366669	Yes
chr1	7308029	7308505	Peak_366664	Yes
chr1	7326416	7326493	Peak_366657	Yes
chr1	7340374	7340578	Peak_366656	Yes
chr1	7355623	7355764	Peak_366652	Yes
chr1	7358560	7360059	Peak_366649	Yes
chr1	7360264	7360362	Peak_366648	Yes
chr1	7374636	7374826	Peak_366645	Yes
chr1	7377927	7378300	Peak_366642	Yes
chr1	7402987	7403087	Peak_366636	Yes
chr1	7418586	7419190	Peak_366633	Yes
chr1	7420395	7421123	Peak_366632	Yes
chr1	7423652	7423735	Peak_366631	Yes
chr1	7427151	7427375	Peak_366629	Yes
chr1	7433850	7434531	Peak_366627	Yes
chr1	7436435	7436538	Peak_366626	Yes
chr1	7444474	7444599	Peak_366621	Yes
chr1	7444666	7445109	Peak_366620	Yes
chr1	7494193	7494319	Peak_366611	Yes
chr1	7500484	7500656	Peak_366610	Yes
chr1	7506867	7507247	Peak_366606	Yes
chr1	7507949	7508580	Peak_366603	Yes
chr1	7518227	7518332	Peak_366596	Yes
chr1	7531673	7532037	Peak_366590	Yes
chr1	7532115	7532269	Peak_366589	Yes
chr1	7538444	7538604	Peak_366587	Yes
chr1	7539026	7539317	Peak_366585	Yes
chr1	7549807	7550109	Peak_366583	Yes
chr1	7551835	7552110	Peak_366582	Yes
chr1	7561884	7562006	Peak_366579	Yes
chr1	7562009	7562393	Peak_366578	Yes
chr1	7600985	7601106	Peak_366569	Yes
chr1	7614930	7615096	Peak_366568	Yes
chr1	7619084	7619530	Peak_366566	Yes
chr1	7621339	7621722	Peak_366565	Yes
chr1	7622869	7623262	Peak_366564	Yes
chr1	7634533	7634756	Peak_366560	Yes
chr1	7637000	7637344	Peak_366559	Yes
chr1	7643874	7643971	Peak_366556	No
chr1	7647307	7647517	Peak_366555	Yes
chr1	7676373	7676888	Peak_366550	Yes
chr1	7681509	7681857	Peak_366549	Yes
chr1	7697184	7697983	Peak_366542	Yes
chr1	7706972	7708722	Peak_366537	Yes
chr1	7717547	7718182	Peak_366534	Yes
chr1	7721148	7721313	Peak_366533	Yes
chr1	7722340	7722469	Peak_366532	Yes
chr1	7731050	7731295	Peak_366528	Yes
chr1	7738221	7738511	Peak_366526	Yes
chr1	7744427	7744890	Peak_366524	Yes
chr1	7769472	7769649	Peak_366522	Yes
chr1	7775236	7775370	Peak_366521	Yes
chr1	7792269	7792612	Peak_366515	Yes
chr1	7792771	7792919	Peak_366514	No
chr1	7811114	7811309	Peak_366510	No
chr1	7812615	7813542	Peak_366508	Yes
chr1	7840814	7841446	Peak_250320,Peak_330292	Yes
chr1	7845549	7845953	Peak_366504	Yes
chr1	7870475	7870883	Peak_366500	Yes
chr1	7887255	7887506	Peak_366498	Yes
chr1	7887617	7887758	Peak_366497	Yes
chr1	7903962	7904093	Peak_366493	No
chr1	7929678	7930010	Peak_366487	Yes
chr1	7948433	7948614	Peak_366483	Yes
chr1	7962916	7962999	Peak_366480	Yes
chr1	7963948	7964109	Peak_366479	No
chr1	8003294	8003616	Peak_366469	Yes
chr1	8003974	8004094	Peak_366468	No
chr1	8045155	8045326	Peak_366453	Yes
chr1	8051910	8052446	Peak_366450	Yes
chr1	8070155	8070442	Peak_366443	Yes
chr1	8074239	8074320	Peak_366440	Yes
chr1	8075059	8075186	Peak_366438	Yes
chr1	8079308	8079587	Peak_366436	Yes
chr1	8079710	8079910	Peak_366435	Yes
chr1	8080129	8080462	Peak_366434	Yes
chr1	8085120	8085217	Peak_366433	Yes
chr1	8095481	8095566	Peak_366431	Yes
chr1	8107785	8108176	Peak_366428	Yes
chr1	8138362	8138845	Peak_366419	Yes
chr1	8142480	8143369	Peak_366418	Yes
chr1	8143867	8143950	Peak_366417	Yes
chr1	8143992	8144781	Peak_366416	Yes
chr1	8150344	8152802	Peak_366414	Yes
chr1	8153619	8153926	Peak_366413	Yes
chr1	8193828	8194037	Peak_366397	Yes
chr1	8202911	8203427	Peak_366391	Yes
chr1	8206351	8206558	Peak_366390	Yes
chr1	8264536	8264793	Peak_366368	Yes
chr1	8264909	8265203	Peak_366367	Yes
chr1	8291979	8292151	Peak_366358	Yes
chr1	8343620	8343830	Peak_366343	Yes
chr1	8362248	8362510	Peak_366340	Yes
chr1	8385900	8385973	Peak_366329	Yes
chr1	8386020	8386163	Peak_366328	Yes
chr1	8390391	8390771	Peak_366326	Yes
chr1	8406462	8406612	Peak_366323	No
chr1	8406826	8407035	Peak_366322	Yes
chr1	8410899	8411001	Peak_366319	Yes
chr1	8412291	8413173	Peak_248025,Peak_366316,Peak_366317	Yes
chr1	8418658	8418814	Peak_366315	Yes
chr1	8418815	8419278	Peak_366314	Yes
chr1	8419537	8419933	Peak_366313	Yes
chr1	8420141	8420248	Peak_366312	Yes
chr1	8420564	8420692	Peak_366311	Yes
chr1	8420812	8421405	Peak_366310	Yes
chr1	8430316	8431427	Peak_366309	Yes
chr1	8437750	8437870	Peak_366308	Yes
chr1	8452858	8453004	Peak_366301	Yes
chr1	8467475	8467800	Peak_366295	Yes
chr1	8472246	8472624	Peak_366293	Yes
chr1	8476947	8477447	Peak_366291	Yes
chr1	8478422	8478748	Peak_366290	Yes
chr1	8482945	8485299	Peak_366286	Yes
chr1	8487536	8487929	Peak_366285	Yes
chr1	8488904	8489008	Peak_366283	No
chr1	8489510	8489675	Peak_366281	Yes
chr1	8489711	8489850	Peak_366280	Yes
chr1	8497457	8497759	Peak_366277	Yes
chr1	8498895	8499751	Peak_366276	Yes
chr1	8499814	8500210	Peak_366275	Yes
chr1	8519874	8520126	Peak_366270	Yes
chr1	8520209	8520488	Peak_366269	Yes
chr1	8534364	8534714	Peak_366260	Yes
chr1	8543847	8543989	Peak_366255	Yes
chr1	8545677	8545802	Peak_366253	No
chr1	8559372	8559548	Peak_366252	Yes
chr1	8563694	8563772	Peak_366251	Yes
chr1	8585235	8586365	Peak_366245	Yes
chr1	8586548	8586812	Peak_366244	Yes
chr1	8587317	8587464	Peak_366241	Yes
chr1	8611218	8611648	Peak_366234	Yes
chr1	8611994	8612206	Peak_366233	Yes
chr1	8612246	8612779	Peak_366232	Yes
chr1	8620510	8620644	Peak_366228	Yes
chr1	8620753	8620955	Peak_366227	Yes
chr1	8621309	8621706	Peak_366226	Yes
chr1	8621735	8621885	Peak_366225	Yes
chr1	8632192	8632493	Peak_366221	Yes
chr1	8638580	8638887	Peak_366214	Yes
chr1	8639001	8639392	Peak_366213	Yes
chr1	8643211	8643669	Peak_366209	Yes
chr1	8653867	8654065	Peak_366205	Yes
chr1	8654221	8654473	Peak_366204	No
chr1	8659399	8659602	Peak_366200	Yes
chr1	8718303	8718937	Peak_366186	Yes
chr1	8720510	8720783	Peak_366183	Yes
chr1	8720841	8721296	Peak_366182	Yes
chr1	8738923	8739011	Peak_366174	Yes
chr1	8739736	8740004	Peak_366173	Yes
chr1	8742133	8742335	Peak_366172	Yes
chr1	8761124	8761517	Peak_366164	Yes
chr1	8761594	8762110	Peak_366163	Yes
chr1	8762844	8763943	Peak_366161	Yes
chr1	8766948	8767547	Peak_366160	Yes
chr1	8783328	8783439	Peak_366155	Yes
chr1	8783596	8783768	Peak_366154	Yes
chr1	8813818	8814249	Peak_366147	Yes
chr1	8814290	8814459	Peak_366146	Yes
chr1	8853289	8853470	Peak_366137	No
chr1	8875012	8875253	Peak_366132	Yes
chr1	8877916	8878219	Peak_366130	Yes
chr1	8889600	8890191	Peak_366124	Yes
chr1	8906059	8906184	Peak_366119	Yes
chr1	8921083	8921369	Peak_432555	Yes
chr1	8923286	8923619	Peak_366111	Yes
chr1	9004022	9004316	Peak_366092	Yes
chr1	9005015	9005138	Peak_366091	Yes
chr1	9100278	9100462	Peak_366071	Yes
chr1	9128483	9128872	Peak_366062	Yes
chr1	9130514	9131037	Peak_366060	Yes
chr1	9163619	9164156	Peak_366050	Yes
chr1	9195004	9195550	Peak_366040	Yes
chr1	9221340	9221569	Peak_366032	Yes
chr1	9221802	9222718	Peak_366031	Yes
chr1	9222855	9223785	Peak_366030	Yes
chr1	9249074	9249600	Peak_366024	Yes
chr1	9249922	9250217	Peak_366023	Yes
chr1	9261017	9261319	Peak_366018	Yes
chr1	9261385	9261677	Peak_366017	Yes
chr1	9264482	9264708	Peak_366015	Yes
chr1	9280505	9280790	Peak_366012	Yes
chr1	9300965	9301068	Peak_366001	Yes
chr1	9302403	9302533	Peak_365999	Yes
chr1	9304582	9304943	Peak_365997	Yes
chr1	9310063	9310358	Peak_365996	Yes
chr1	9323979	9324243	Peak_365993	Yes
chr1	9349248	9349553	Peak_365981	Yes
chr1	9350706	9351956	Peak_365980	Yes
chr1	9354435	9354677	Peak_365978	Yes
chr1	9356040	9356339	Peak_365977	Yes
chr1	9357008	9357224	Peak_365976	Yes
chr1	9360372	9360703	Peak_365974	Yes
chr1	9375972	9376168	Peak_365971	Yes
chr1	9381203	9381599	Peak_365969	Yes
chr1	9382893	9383143	Peak_365967	Yes
chr1	9400945	9401094	Peak_365961	Yes
chr1	9418416	9418691	Peak_365955	Yes
chr1	9422940	9423439	Peak_365953	Yes
chr1	9427039	9427153	Peak_365952	Yes
chr1	9431208	9432041	Peak_365951	Yes
chr1	9432676	9433008	Peak_365950	Yes
chr1	9436026	9437440	Peak_365949	Yes
chr1	9452856	9453214	Peak_365944	Yes
chr1	9457991	9458141	Peak_365943	Yes
chr1	9458259	9458440	Peak_365942	Yes
chr1	9458683	9458756	Peak_365940	Yes
chr1	9461956	9462271	Peak_365938	Yes
chr1	9465619	9465731	Peak_365937	Yes
chr1	9480437	9481030	Peak_365933	Yes
chr1	9486371	9486856	Peak_365929	Yes
chr1	9495159	9495399	Peak_365925	Yes
chr1	9497977	9499016	Peak_365924	Yes
chr1	9515874	9516169	Peak_365917	Yes
chr1	9526706	9527613	Peak_365915	Yes
chr1	9527726	9527812	Peak_365914	Yes
chr1	9533029	9533650	Peak_365912	Yes
chr1	9535359	9535860	Peak_365911	Yes
chr1	9545241	9545404	Peak_365909	No
chr1	9638997	9639153	Peak_365879	Yes
chr1	9648397	9649813	Peak_365876	Yes
chr1	9650319	9650642	Peak_365875	Yes
chr1	9654389	9654739	Peak_365874	Yes
chr1	9654855	9655165	Peak_365873	Yes
chr1	9655176	9655418	Peak_365872	Yes
chr1	9656775	9657496	Peak_365871	Yes
chr1	9663396	9663673	Peak_365869	Yes
chr1	9665120	9665289	Peak_365867	Yes
chr1	9667331	9667406	Peak_365865	Yes
chr1	9673029	9673161	Peak_365863	Yes
chr1	9673285	9673531	Peak_365862	Yes
chr1	9711471	9712610	Peak_365853	Yes
chr1	9714405	9714499	Peak_365852	Yes
chr1	9728126	9728735	Peak_365850	Yes
chr1	9744994	9745086	Peak_365845	Yes
chr1	9775533	9775828	Peak_365840	Yes
chr1	9775842	9776309	Peak_365839	Yes
chr1	9795466	9795641	Peak_365834	Yes
chr1	9795797	9796029	Peak_365833	Yes
chr1	9797485	9798640	Peak_365832	Yes
chr1	9815085	9815202	Peak_365824	Yes
chr1	9815382	9815698	Peak_365823	Yes
chr1	9815969	9816076	Peak_365822	Yes
chr1	9833187	9833341	Peak_364831	No
chr1	9885320	9885641	Peak_365808	Yes
chr1	9894539	9895286	Peak_365806	Yes
chr1	9905076	9905318	Peak_365800	Yes
chr1	9909410	9909560	Peak_365797	Yes
chr1	9909594	9910205	Peak_365796	Yes
chr1	9910554	9910688	Peak_365795	Yes
chr1	9921014	9921791	Peak_365790	Yes
chr1	9932580	9933183	Peak_365787	Yes
chr1	9937029	9937359	Peak_365785	Yes
chr1	9937907	9938652	Peak_365784	Yes
chr1	9950626	9951139	Peak_365781	Yes
chr1	9953100	9953395	Peak_365780	Yes
chr1	9960503	9960624	Peak_365779	Yes
chr1	9960839	9960932	Peak_365778	Yes
chr1	9961113	9962212	Peak_365777	Yes
chr1	9974752	9975105	Peak_365773	Yes
chr1	9989919	9990416	Peak_365764	Yes
chr1	10015765	10015919	Peak_365760	No
chr1	10050658	10051228	Peak_365750	Yes
chr1	10124006	10124371	Peak_365733	Yes
chr1	10134531	10134852	Peak_365723	Yes
chr1	10165483	10166085	Peak_365715	Yes
chr1	10167459	10168179	Peak_365713	Yes
chr1	10190646	10190733	Peak_365705	No
chr1	10193484	10193685	Peak_365704	Yes
chr1	10224765	10225074	Peak_365698	Yes
chr1	10239507	10239610	Peak_365692	Yes
chr1	10269824	10271725	Peak_365683	Yes
chr1	10313404	10314568	Peak_365673	Yes
chr1	10339111	10339428	Peak_365670	Yes
chr1	10345022	10346074	Peak_365667	Yes
chr1	10355382	10355877	Peak_365663	Yes
chr1	10355878	10356096	Peak_365662	Yes
chr1	10364480	10364618	Peak_365659	Yes
chr1	10368072	10368309	Peak_365658	Yes
chr1	10387799	10388551	Peak_365655	Yes
chr1	10421717	10421836	Peak_365650	Yes
chr1	10425434	10425606	Peak_365647	Yes
chr1	10434247	10434759	Peak_365646	Yes
chr1	10437307	10438561	Peak_365645	Yes
chr1	10439842	10439984	Peak_365643	No
chr1	10440791	10440911	Peak_365642	Yes
chr1	10467619	10468111	Peak_365631	Yes
chr1	10493702	10494125	Peak_365618	Yes
chr1	10509876	10510196	Peak_365615	Yes
chr1	10510943	10511137	Peak_365613	Yes
chr1	10552509	10552750	Peak_365599	No
chr1	10556711	10556998	Peak_365595	Yes
chr1	10564339	10564482	Peak_365593	Yes
chr1	10570673	10570909	Peak_365590	Yes
chr1	10571857	10573597	Peak_365588	Yes
chr1	10573699	10573965	Peak_365587	Yes
chr1	10574575	10574666	Peak_365585	Yes
chr1	10575986	10576285	Peak_365583	Yes
chr1	10576984	10577825	Peak_365582	Yes
chr1	10589240	10589531	Peak_365578	Yes
chr1	10591473	10591632	Peak_365576	Yes
chr1	10591803	10592346	Peak_365575	Yes
chr1	10597159	10597718	Peak_365574	Yes
chr1	10598289	10598627	Peak_365572	Yes
chr1	10599591	10599749	Peak_365571	Yes
chr1	10600797	10600958	Peak_365570	Yes
chr1	10601510	10601771	Peak_365568	Yes
chr1	10601948	10602088	Peak_365567	Yes
chr1	10611668	10611855	Peak_365561	Yes
chr1	10615693	10616000	Peak_365558	Yes
chr1	10652451	10652735	Peak_365547	Yes
chr1	10657932	10658806	Peak_365544	Yes
chr1	10685334	10685675	Peak_365532	Yes
chr1	10690798	10691631	Peak_365529	Yes
chr1	10692273	10692444	Peak_365528	Yes
chr1	10694515	10694698	Peak_365527	Yes
chr1	10696094	10696449	Peak_365526	Yes
chr1	10699786	10699964	Peak_365524	Yes
chr1	10702166	10702276	Peak_365521	Yes
chr1	10703346	10704168	Peak_365520	Yes
chr1	10716412	10716781	Peak_365517	Yes
chr1	10723460	10724079	Peak_365515	Yes
chr1	10724949	10725057	Peak_365514	Yes
chr1	10732456	10732654	Peak_365510	Yes
chr1	10732979	10733208	Peak_365509	Yes
chr1	10734391	10734689	Peak_365508	Yes
chr1	10741445	10741539	Peak_365505	Yes
chr1	10741746	10741953	Peak_365504	Yes
chr1	10742133	10742312	Peak_365503	Yes
chr1	10746128	10747065	Peak_365499	Yes
chr1	10751868	10752856	Peak_365498	Yes
chr1	10764135	10765051	Peak_365495	Yes
chr1	10769115	10769602	Peak_365494	Yes
chr1	10769692	10770173	Peak_365493	Yes
chr1	10772726	10773033	Peak_365492	Yes
chr1	10774429	10775190	Peak_365490	Yes
chr1	10775455	10776384	Peak_365489	Yes
chr1	10778184	10778379	Peak_365487	Yes
chr1	10778476	10778578	Peak_365486	Yes
chr1	10780628	10780843	Peak_365485	Yes
chr1	10781112	10781328	Peak_365484	Yes
chr1	10784134	10784550	Peak_365482	Yes
chr1	10785655	10785825	Peak_365480	Yes
chr1	10787489	10788539	Peak_365478	Yes
chr1	10793455	10793646	Peak_365475	Yes
chr1	10794467	10795960	Peak_365474	Yes
chr1	10796652	10797576	Peak_365472	Yes
chr1	10797696	10797808	Peak_365471	Yes
chr1	10803454	10803589	Peak_365469	Yes
chr1	10813375	10813911	Peak_365466	Yes
chr1	10820539	10820868	Peak_365462	Yes
chr1	10821374	10821682	Peak_365460	Yes
chr1	10821811	10821985	Peak_365459	Yes
chr1	10822231	10822419	Peak_365457	Yes
chr1	10833269	10833388	Peak_365453	Yes
chr1	10836354	10836722	Peak_365452	Yes
chr1	10839935	10840198	Peak_365450	Yes
chr1	10842483	10842578	Peak_365448	Yes
chr1	10853930	10854227	Peak_365444	Yes
chr1	10854291	10854474	Peak_365443	Yes
chr1	10855652	10857094	Peak_365440	Yes
chr1	10868006	10868124	Peak_365437	Yes
chr1	10869470	10869747	Peak_365436	Yes
chr1	10869809	10870322	Peak_365435	Yes
chr1	10873574	10873912	Peak_365434	Yes
chr1	10876912	10877251	Peak_365432	Yes
chr1	10880395	10881344	Peak_365427	Yes
chr1	10883205	10883334	Peak_365426	Yes
chr1	10884883	10885125	Peak_365425	Yes
chr1	10894780	10895603	Peak_365422	Yes
chr1	10899207	10899929	Peak_365419	Yes
chr1	10920016	10920505	Peak_365411	Yes
chr1	10922731	10923102	Peak_365410	Yes
chr1	10934693	10934834	Peak_365406	Yes
chr1	10935513	10936206	Peak_365405	No
chr1	10951056	10951199	Peak_365395	Yes
chr1	10957626	10958072	Peak_365392	Yes
chr1	10958198	10958580	Peak_365391	Yes
chr1	10958660	10958760	Peak_365390	Yes
chr1	10961165	10961656	Peak_365387	Yes
chr1	10974285	10974789	Peak_365381	Yes
chr1	10974884	10975090	Peak_365380	Yes
chr1	10980409	10980587	Peak_365379	Yes
chr1	11000043	11000276	Peak_365373	Yes
chr1	11000350	11000476	Peak_365372	Yes
chr1	11006381	11006627	Peak_365368	Yes
chr1	11006647	11008150	Peak_365367	Yes
chr1	11012226	11012319	Peak_365366	Yes
chr1	11016458	11017547	Peak_365364	Yes
chr1	11018676	11019251	Peak_365363	Yes
chr1	11020143	11021378	Peak_365361	Yes
chr1	11021445	11021663	Peak_365360	Yes
chr1	11026874	11027336	Peak_365357	Yes
chr1	11082282	11082359	Peak_365339	No
chr1	11083211	11083407	Peak_429271	No
chr1	11083660	11083884	Peak_429270	Yes
chr1	11086962	11087309	Peak_365338	Yes
chr1	11087623	11087786	Peak_365337	Yes
chr1	11090041	11090228	Peak_365336	Yes
chr1	11097734	11098010	Peak_365328	Yes
chr1	11103982	11104580	Peak_365327	Yes
chr1	11106616	11107122	Peak_365324	Yes
chr1	11107173	11107458	Peak_365323	Yes
chr1	11119238	11121207	Peak_365320	Yes
chr1	11129421	11129578	Peak_365315	Yes
chr1	11136661	11137004	Peak_365313	Yes
chr1	11141415	11141585	Peak_365309	Yes
chr1	11166651	11166863	Peak_365305	Yes
chr1	11193470	11193585	Peak_365303	Yes
chr1	11196497	11197406	Peak_365299	Yes
chr1	11203371	11203533	Peak_365298	Yes
chr1	11207404	11207869	Peak_365297	Yes
chr1	11212919	11213176	Peak_365295	Yes
chr1	11248977	11249409	Peak_365290	Yes
chr1	11254544	11255542	Peak_365289	Yes
chr1	11259326	11259568	Peak_365285	Yes
chr1	11260020	11260415	Peak_365284	No
chr1	11260484	11260674	Peak_365283	No
chr1	11273353	11273689	Peak_365281	Yes
chr1	11274850	11275611	Peak_365280	Yes
chr1	11288217	11289673	Peak_365277	Yes
chr1	11297045	11297272	Peak_365276	Yes
chr1	11300540	11300770	Peak_365275	Yes
chr1	11301492	11302950	Peak_365274	Yes
chr1	11302968	11303413	Peak_365273	Yes
chr1	11314069	11314535	Peak_365271	No
chr1	11321893	11323026	Peak_365270	Yes
chr1	11345908	11346930	Peak_365268	Yes
chr1	11348093	11348304	Peak_365267	No
chr1	11350624	11351085	Peak_365265	Yes
chr1	11358694	11359021	Peak_365263	Yes
chr1	11368856	11368952	Peak_365261	Yes
chr1	11369456	11369530	Peak_365259	Yes
chr1	11370806	11371026	Peak_365258	Yes
chr1	11372033	11372170	Peak_365257	Yes
chr1	11374294	11375077	Peak_365254	Yes
chr1	11398896	11399369	Peak_365243	Yes
chr1	11405398	11406006	Peak_365239	Yes
chr1	11434930	11435406	Peak_365229	Yes
chr1	11435457	11435622	Peak_365228	Yes
chr1	11451643	11451856	Peak_365222	Yes
chr1	11474301	11474507	Peak_365215	Yes
chr1	11476173	11476397	Peak_365212	No
chr1	11488738	11489191	Peak_365211	Yes
chr1	11499871	11500050	Peak_365208	Yes
chr1	11501222	11501954	Peak_365207	Yes
chr1	11507948	11508144	Peak_365204	Yes
chr1	11509071	11509217	Peak_365202	Yes
chr1	11532078	11532150	Peak_365193	No
chr1	11532907	11533024	Peak_365192	Yes
chr1	11533034	11533955	Peak_365191	Yes
chr1	11534895	11535259	Peak_365190	Yes
chr1	11538335	11539786	Peak_365189	Yes
chr1	11540015	11540585	Peak_365188	Yes
chr1	11549661	11550879	Peak_365187	Yes
chr1	11559772	11560448	Peak_365184	Yes
chr1	11560872	11561024	Peak_365183	Yes
chr1	11561090	11561419	Peak_365182	Yes
chr1	11561476	11561875	Peak_365181	Yes
chr1	11575767	11576170	Peak_365177	Yes
chr1	11579659	11579746	Peak_365176	Yes
chr1	11589885	11590001	Peak_365172	Yes
chr1	11590846	11590919	Peak_365171	Yes
chr1	11596868	11597068	Peak_365167	Yes
chr1	11597136	11597393	Peak_365166	Yes
chr1	11599081	11599198	Peak_365164	Yes
chr1	11599365	11599927	Peak_365163	Yes
chr1	11600071	11600624	Peak_365162	Yes
chr1	11605894	11606347	Peak_365161	Yes
chr1	11606529	11606784	Peak_365160	Yes
chr1	11617401	11617638	Peak_365157	Yes
chr1	11649715	11650036	Peak_365147	Yes
chr1	11650053	11650207	Peak_365146	No
chr1	11654304	11654593	Peak_365144	Yes
chr1	11675130	11675393	Peak_365140	Yes
chr1	11677277	11677475	Peak_365138	Yes
chr1	11688064	11688543	Peak_365134	No
chr1	11689916	11690071	Peak_365133	Yes
chr1	11698179	11698935	Peak_365131	Yes
chr1	11710578	11710927	Peak_365125	Yes
chr1	11733310	11733415	Peak_365120	Yes
chr1	11781500	11781624	Peak_365102	Yes
chr1	11787701	11788559	Peak_365100	Yes
chr1	11789161	11789308	Peak_365099	Yes
chr1	11789660	11789817	Peak_365098	Yes
chr1	11790042	11790183	Peak_365097	Yes
chr1	11796852	11797332	Peak_365095	Yes
chr1	11806687	11807926	Peak_365091	Yes
chr1	11809075	11809444	Peak_365090	Yes
chr1	11809878	11810112	Peak_365089	Yes
chr1	11825950	11826542	Peak_365083	Yes
chr1	11839183	11839319	Peak_365080	Yes
chr1	11839739	11840029	Peak_365079	No
chr1	11847860	11848000	Peak_365076	Yes
chr1	11855360	11855878	Peak_365069	Yes
chr1	11860845	11861067	Peak_383213	Yes
chr1	11861170	11864028	Peak_365064,Peak_383212	Yes
chr1	11877765	11877838	Peak_365057	No
chr1	11885544	11886110	Peak_365054	Yes
chr1	11888819	11889289	Peak_365050	Yes
chr1	11897082	11897299	Peak_365049	Yes
chr1	11897845	11897937	Peak_365047	Yes
chr1	11907842	11908508	Peak_365043	Yes
chr1	11918834	11919666	Peak_365039	Yes
chr1	11985230	11987182	Peak_365024	Yes
chr1	11991214	11991517	Peak_365021	Yes
chr1	12017060	12017171	Peak_365016	Yes
chr1	12023623	12024483	Peak_365013	Yes
chr1	12026350	12026503	Peak_365011	Yes
chr1	12042012	12042121	Peak_365005	Yes
chr1	12042443	12042697	Peak_365004	Yes
chr1	12044064	12045477	Peak_365003	Yes
chr1	12050133	12050371	Peak_365001	Yes
chr1	12050518	12050605	Peak_365000	Yes
chr1	12050722	12051238	Peak_364999	Yes
chr1	12051251	12052081	Peak_364998	Yes
chr1	12052566	12052653	Peak_364997	Yes
chr1	12054804	12055372	Peak_364996	No
chr1	12056117	12056239	Peak_364994	Yes
chr1	12062151	12062405	Peak_364993	Yes
chr1	12065690	12065761	Peak_364990	Yes
chr1	12072623	12072743	Peak_364983	Yes
chr1	12089972	12090121	Peak_364980	Yes
chr1	12090496	12090945	Peak_364979	Yes
chr1	12091767	12091914	Peak_364978	Yes
chr1	12107352	12107471	Peak_364811	Yes
chr1	12107549	12107946	Peak_364810	Yes
chr1	12112054	12112266	Peak_364807	Yes
chr1	12141135	12141568	Peak_364798	Yes
chr1	12147525	12148306	Peak_364794	Yes
chr1	12156957	12157293	Peak_364793	Yes
chr1	12169724	12169927	Peak_364790	Yes
chr1	12170100	12170183	Peak_364789	Yes
chr1	12199296	12200496	Peak_364780	Yes
chr1	12205027	12205179	Peak_364777	Yes
chr1	12205424	12205546	Peak_364776	Yes
chr1	12213125	12213740	Peak_364772	Yes
chr1	12217520	12217869	Peak_364771	Yes
chr1	12228401	12228720	Peak_364767	Yes
chr1	12245764	12246471	Peak_364761	Yes
chr1	12246714	12247082	Peak_364760	Yes
chr1	12247682	12248103	Peak_364759	Yes
chr1	12248140	12248230	Peak_364758	Yes
chr1	12261562	12261689	Peak_364754	Yes
chr1	12292384	12292633	Peak_364741	Yes
chr1	12305065	12305262	Peak_364737	Yes
chr1	12336046	12336166	Peak_364732	Yes
chr1	12336221	12336299	Peak_364731	Yes
chr1	12336372	12336828	Peak_364730	Yes
chr1	12336900	12336988	Peak_364729	No
chr1	12337949	12338057	Peak_364728	Yes
chr1	12360823	12361076	Peak_364724	Yes
chr1	12362375	12362509	Peak_364723	Yes
chr1	12363459	12363798	Peak_364721	Yes
chr1	12376310	12376849	Peak_364717	Yes
chr1	12387034	12387317	Peak_364716	Yes
chr1	12395929	12397160	Peak_364713	Yes
chr1	12403954	12404122	Peak_364712	Yes
chr1	12420084	12420178	Peak_364709	Yes
chr1	12420902	12421206	Peak_364708	Yes
chr1	12436106	12436275	Peak_364704	Yes
chr1	12465403	12465784	Peak_364698	Yes
chr1	12466083	12466316	Peak_364696	Yes
chr1	12466326	12467902	Peak_364695	Yes
chr1	12480157	12480308	Peak_364693	Yes
chr1	12482620	12482781	Peak_364692	Yes
chr1	12483489	12483598	Peak_364691	Yes
chr1	12483673	12484343	Peak_364690	Yes
chr1	12491747	12492139	Peak_364687	Yes
chr1	12494322	12494546	Peak_364685	Yes
chr1	12494648	12495241	Peak_364684	Yes
chr1	12508700	12509395	Peak_364682	Yes
chr1	12510231	12511854	Peak_364681	Yes
chr1	12518648	12519939	Peak_364677	Yes
chr1	12524061	12525186	Peak_364675	Yes
chr1	12526395	12526531	Peak_364674	No
chr1	12527847	12528136	Peak_364673	Yes
chr1	12529168	12530485	Peak_364672	Yes
chr1	12533153	12533278	Peak_364670	Yes
chr1	12533985	12534525	Peak_364669	Yes
chr1	12537904	12540423	Peak_364668	Yes
chr1	12540802	12541359	Peak_364667	Yes
chr1	12545200	12546138	Peak_364666	Yes
chr1	12546182	12546293	Peak_364665	Yes
chr1	12546571	12546721	Peak_364664	Yes
chr1	12549519	12549811	Peak_364663	Yes
chr1	12550922	12551115	Peak_364662	Yes
chr1	12551250	12552233	Peak_364661	Yes
chr1	12556293	12557832	Peak_364660	Yes
chr1	12559537	12560223	Peak_364659	Yes
chr1	12565355	12565461	Peak_364658	Yes
chr1	12568039	12568928	Peak_364654	Yes
chr1	12569429	12569870	Peak_364653	Yes
chr1	12570933	12571874	Peak_364652	Yes
chr1	12589505	12589705	Peak_364641	Yes
chr1	12590506	12590824	Peak_364640	Yes
chr1	12607879	12608172	Peak_364634	Yes
chr1	12639023	12639151	Peak_364624	Yes
chr1	12639193	12640220	Peak_364623	Yes
chr1	12644273	12644439	Peak_364621	Yes
chr1	12648238	12648680	Peak_364620	Yes
chr1	12653960	12654079	Peak_364618	Yes
chr1	12656777	12656922	Peak_364615	Yes
chr1	12658791	12659609	Peak_364613	Yes
chr1	12675414	12675733	Peak_364609	Yes
chr1	12677586	12677809	Peak_364605	Yes
chr1	12677901	12678738	Peak_364604	Yes
chr1	12679010	12679399	Peak_364603	Yes
chr1	12679707	12680381	Peak_364602	Yes
chr1	12696500	12696804	Peak_364597	Yes
chr1	12820741	12820892	Peak_364558	Yes
chr1	12834598	12834676	Peak_364554	No
chr1	12977537	12977631	Peak_364550	No
chr1	13644891	13644964	Peak_364539	No
chr1	13805303	13805405	Peak_364525	Yes
chr1	13805638	13806335	Peak_364524	Yes
chr1	13835662	13835996	Peak_364522	Yes
chr1	13847477	13847711	Peak_364519	Yes
chr1	13863555	13863674	Peak_364517	Yes
chr1	13910055	13910463	Peak_364502	Yes
chr1	13911982	13912922	Peak_364500	Yes
chr1	13913623	13914108	Peak_364498	Yes
chr1	13919997	13920379	Peak_364495	Yes
chr1	13920479	13920883	Peak_364494	Yes
chr1	13942125	13942224	Peak_364484	Yes
chr1	13992348	13992439	Peak_364477	Yes
chr1	14017309	14017852	Peak_364470	No
chr1	14021506	14021787	Peak_364466	Yes
chr1	14043867	14044052	Peak_364459	No
chr1	14060910	14061025	Peak_364454	Yes
chr1	14064035	14064187	Peak_364453	Yes
chr1	14067941	14068301	Peak_364452	No
chr1	14086065	14086230	Peak_364446	Yes
chr1	14107100	14107269	Peak_364441	Yes
chr1	14119373	14119470	Peak_364437	Yes
chr1	14238614	14238765	Peak_364411	Yes
chr1	14257352	14257773	Peak_364407	Yes
chr1	14257777	14258126	Peak_364406	Yes
chr1	14273461	14274063	Peak_364405	No
chr1	14291796	14291886	Peak_364400	Yes
chr1	14296649	14296871	Peak_364394	No
chr1	14308242	14308399	Peak_364393	No
chr1	14347313	14347463	Peak_364388	Yes
chr1	14354207	14354521	Peak_364385	Yes
chr1	14372672	14373340	Peak_364381	No
chr1	14389152	14389302	Peak_364379	Yes
chr1	14423006	14423201	Peak_364373	Yes
chr1	14424875	14424957	Peak_364372	Yes
chr1	14425040	14425209	Peak_364371	Yes
chr1	14433985	14434479	Peak_364368	No
chr1	14435742	14436040	Peak_364366	Yes
chr1	14438141	14438653	Peak_364365	Yes
chr1	14453832	14454048	Peak_364361	Yes
chr1	14461669	14462100	Peak_364359	Yes
chr1	14467160	14467752	Peak_364356	Yes
chr1	14468692	14469006	Peak_364355	Yes
chr1	14476011	14476147	Peak_364353	Yes
chr1	14507995	14508246	Peak_364346	Yes
chr1	14508292	14508411	Peak_364345	Yes
chr1	14528575	14528701	Peak_364341	No
chr1	14538382	14538899	Peak_364338	Yes
chr1	14539120	14539227	Peak_364337	Yes
chr1	14563696	14564103	Peak_364335	Yes
chr1	14564164	14564422	Peak_364334	Yes
chr1	14609125	14609203	Peak_364323	Yes
chr1	14631201	14631409	Peak_364321	Yes
chr1	14751094	14751170	Peak_364314	Yes
chr1	14785975	14786397	Peak_364307	Yes
chr1	14800918	14801095	Peak_364303	No
chr1	14806427	14806868	Peak_364301	Yes
chr1	14819032	14819235	Peak_364298	No
chr1	14821012	14821460	Peak_364297	Yes
chr1	14821792	14822473	Peak_364296	Yes
chr1	14823099	14823384	Peak_364294	Yes
chr1	14833350	14834295	Peak_364291	Yes
chr1	14835104	14835523	Peak_364289	Yes
chr1	14839852	14839986	Peak_364287	Yes
chr1	14840244	14840361	Peak_364286	Yes
chr1	14844063	14844313	Peak_364284	Yes
chr1	14848057	14848194	Peak_364283	Yes
chr1	14861523	14861642	Peak_364280	No
chr1	14871895	14872017	Peak_364278	Yes
chr1	14872865	14873175	Peak_364275	Yes
chr1	14877275	14878439	Peak_364273	Yes
chr1	14890041	14890737	Peak_364271	No
chr1	14897900	14898076	Peak_364268	Yes
chr1	14899621	14899697	Peak_364266	Yes
chr1	14903317	14903672	Peak_364265	Yes
chr1	14912679	14912840	Peak_364259	Yes
chr1	14928377	14928966	Peak_364256	Yes
chr1	14934561	14934798	Peak_364254	No
chr1	14940600	14940715	Peak_364253	Yes
chr1	14943009	14944160	Peak_364251	Yes
chr1	14951412	14951869	Peak_364249	Yes
chr1	14952204	14952402	Peak_364247	Yes
chr1	14952493	14952728	Peak_364246	Yes
chr1	14966449	14966558	Peak_364242	Yes
chr1	14987214	14987287	Peak_364232	Yes
chr1	14994314	14994387	Peak_364229	Yes
chr1	14998335	14998892	Peak_364226	Yes
chr1	15015024	15016040	Peak_364223	Yes
chr1	15016909	15017088	Peak_364222	Yes
chr1	15020570	15020643	Peak_364221	Yes
chr1	15040722	15040838	Peak_364219	Yes
chr1	15050789	15051120	Peak_364208	Yes
chr1	15052691	15052881	Peak_364207	Yes
chr1	15063705	15063782	Peak_364206	Yes
chr1	15071961	15072307	Peak_364204	Yes
chr1	15072675	15075569	Peak_364203	Yes
chr1	15082090	15082616	Peak_364201	Yes
chr1	15086046	15086247	Peak_364199	Yes
chr1	15093122	15093388	Peak_364197	Yes
chr1	15094095	15094231	Peak_364196	Yes
chr1	15105819	15105972	Peak_364195	Yes
chr1	15107314	15107885	Peak_364194	Yes
chr1	15114018	15114457	Peak_364191	Yes
chr1	15120546	15120660	Peak_364188	Yes
chr1	15137546	15137739	Peak_364187	Yes
chr1	15169042	15169262	Peak_364182	Yes
chr1	15172519	15172697	Peak_364181	Yes
chr1	15173745	15173965	Peak_364179	Yes
chr1	15174937	15175505	Peak_364178	Yes
chr1	15180543	15181323	Peak_364176	Yes
chr1	15195758	15196561	Peak_364171	Yes
chr1	15196699	15197748	Peak_364170	Yes
chr1	15205085	15205363	Peak_364169	Yes
chr1	15205569	15205684	Peak_364168	Yes
chr1	15211174	15211606	Peak_364167	Yes
chr1	15221324	15222540	Peak_364160	Yes
chr1	15228560	15228673	Peak_364156	Yes
chr1	15243694	15243965	Peak_364145	Yes
chr1	15251495	15251878	Peak_364143	Yes
chr1	15252550	15252866	Peak_364142	Yes
chr1	15256360	15257025	Peak_364140	Yes
chr1	15276228	15276377	Peak_364132	Yes
chr1	15280707	15281152	Peak_364128	Yes
chr1	15281805	15282398	Peak_364127	Yes
chr1	15287240	15287582	Peak_364125	Yes
chr1	15298321	15299584	Peak_364119	Yes
chr1	15307909	15308111	Peak_364117	Yes
chr1	15322634	15322983	Peak_364109	Yes
chr1	15370645	15370841	Peak_364098	Yes
chr1	15393756	15393933	Peak_364094	Yes
chr1	15396636	15396898	Peak_364090	Yes
chr1	15399947	15400151	Peak_364089	Yes
chr1	15404187	15404408	Peak_364086	Yes
chr1	15441668	15441839	Peak_364080	Yes
chr1	15442594	15442777	Peak_364079	Yes
chr1	15466207	15467083	Peak_364076	Yes
chr1	15482479	15482568	Peak_364069	Yes
chr1	15490938	15491025	Peak_364062	No
chr1	15524493	15524842	Peak_364041	Yes
chr1	15527022	15527665	Peak_364040	Yes
chr1	15529004	15529130	Peak_364038	Yes
chr1	15533142	15533407	Peak_364035	Yes
chr1	15545814	15546052	Peak_364030	Yes
chr1	15546376	15546517	Peak_364029	Yes
chr1	15556827	15557037	Peak_364028	Yes
chr1	15630528	15631028	Peak_364003	Yes
chr1	15651037	15651309	Peak_363993	Yes
chr1	15652893	15653544	Peak_363991	Yes
chr1	15653600	15654077	Peak_363990	Yes
chr1	15661051	15661176	Peak_363987	Yes
chr1	15664997	15665247	Peak_363985	Yes
chr1	15675139	15675329	Peak_363981	No
chr1	15697160	15697247	Peak_363975	Yes
chr1	15703521	15703635	Peak_363973	Yes
chr1	15731282	15732092	Peak_363963	Yes
chr1	15739331	15739800	Peak_363957	Yes
chr1	15747765	15748143	Peak_363951	Yes
chr1	15753272	15754351	Peak_363947	Yes
chr1	15766735	15766900	Peak_363944	No
chr1	15770959	15771113	Peak_363939	Yes
chr1	15809678	15809873	Peak_363932	Yes
chr1	15852838	15853992	Peak_363924	Yes
chr1	15909590	15909927	Peak_363915	Yes
chr1	15931320	15931497	Peak_344783	Yes
chr1	15959946	15960902	Peak_363899	Yes
chr1	15987085	15987281	Peak_363891	Yes
chr1	15987966	15988057	Peak_363890	Yes
chr1	15991036	15991929	Peak_363886	Yes
chr1	16030574	16030722	Peak_363871	Yes
chr1	16042415	16044377	Peak_363868	Yes
chr1	16044894	16044969	Peak_363866	Yes
chr1	16053309	16053457	Peak_363865	Yes
chr1	16054754	16054905	Peak_363864	Yes
chr1	16063288	16063618	Peak_363860	Yes
chr1	16082948	16083876	Peak_363851	Yes
chr1	16122514	16123127	Peak_363840	Yes
chr1	16173189	16175322	Peak_363828	Yes
chr1	16175728	16176833	Peak_363827	Yes
chr1	16224915	16224997	Peak_363812	No
chr1	16255465	16256413	Peak_363806	Yes
chr1	16259885	16259991	Peak_363804	Yes
chr1	16260896	16261078	Peak_363803	Yes
chr1	16261472	16261572	Peak_363802	Yes
chr1	16261961	16262341	Peak_363801	Yes
chr1	16262456	16262722	Peak_363800	Yes
chr1	16268403	16268640	Peak_363798	Yes
chr1	16272289	16272611	Peak_363797	Yes
chr1	16280458	16281867	Peak_363793	Yes
chr1	16340491	16340719	Peak_363778	Yes
chr1	16342443	16342770	Peak_363777	Yes
chr1	16344426	16345020	Peak_363776	Yes
chr1	16378322	16378471	Peak_363766	No
chr1	16381875	16382106	Peak_363763	Yes
chr1	16382579	16383125	Peak_363762	Yes
chr1	16393676	16393900	Peak_363758	Yes
chr1	16395194	16395312	Peak_363757	Yes
chr1	16403424	16403648	Peak_363752	Yes
chr1	16404800	16406358	Peak_363751	Yes
chr1	16410056	16410276	Peak_363747	Yes
chr1	16414533	16414607	Peak_363746	Yes
chr1	16417975	16418117	Peak_363743	Yes
chr1	16418763	16419239	Peak_363742	Yes
chr1	16441241	16441484	Peak_363736	Yes
chr1	16451172	16451388	Peak_363732	Yes
chr1	16452759	16453073	Peak_363730	Yes
chr1	16453918	16454580	Peak_363729	Yes
chr1	16454893	16455530	Peak_363728	Yes
chr1	16458267	16458519	Peak_363727	Yes
chr1	16464458	16464533	Peak_363725	Yes
chr1	16464546	16464712	Peak_363724	Yes
chr1	16464741	16464860	Peak_363723	Yes
chr1	16465200	16465703	Peak_363722	Yes
chr1	16468178	16468291	Peak_363721	Yes
chr1	16469898	16471027	Peak_363718	Yes
chr1	16471134	16471425	Peak_363717	Yes
chr1	16471498	16471705	Peak_363716	Yes
chr1	16471725	16471867	Peak_363715	Yes
chr1	16472120	16472365	Peak_363714	Yes
chr1	16475135	16475561	Peak_363711	Yes
chr1	16475924	16476222	Peak_363710	Yes
chr1	16480660	16480743	Peak_363707	Yes
chr1	16485405	16486004	Peak_363703	Yes
chr1	16497912	16498383	Peak_363699	Yes
chr1	16502548	16502663	Peak_363696	Yes
chr1	16509690	16509949	Peak_363691	Yes
chr1	16535134	16535277	Peak_363679	Yes
chr1	16536143	16536952	Peak_363678	Yes
chr1	16538938	16539430	Peak_363676	Yes
chr1	16544874	16545061	Peak_363672	Yes
chr1	16558277	16558959	Peak_363666	Yes
chr1	16559610	16559701	Peak_363665	Yes
chr1	16573597	16573785	Peak_363657	Yes
chr1	16576582	16576778	Peak_363656	Yes
chr1	16580467	16580973	Peak_363654	Yes
chr1	16594699	16594871	Peak_363649	Yes
chr1	16626933	16627381	Peak_363644	Yes
chr1	16700475	16700707	Peak_363631	Yes
chr1	16702529	16702948	Peak_363628	Yes
chr1	16708449	16708592	Peak_363625	No
chr1	16719887	16719970	Peak_363620	Yes
chr1	16721645	16721960	Peak_363619	Yes
chr1	16722352	16723890	Peak_363618	Yes
chr1	16724170	16724372	Peak_363617	Yes
chr1	16752271	16752348	Peak_363609	Yes
chr1	16768081	16768227	Peak_363602	Yes
chr1	16778233	16779011	Peak_363598	Yes
chr1	16785220	16786304	Peak_363595	Yes
chr1	17250776	17251008	Peak_363590	Yes
chr1	17252784	17253011	Peak_363589	Yes
chr1	17265523	17265869	Peak_363586	Yes
chr1	17265973	17266608	Peak_363585	Yes
chr1	17274875	17275852	Peak_363584	Yes
chr1	17279349	17279574	Peak_363581	Yes
chr1	17279683	17279795	Peak_363580	Yes
chr1	17301417	17301546	Peak_363574	Yes
chr1	17305616	17305875	Peak_363571	Yes
chr1	17316604	17316722	Peak_363568	Yes
chr1	17318679	17318836	Peak_363567	Yes
chr1	17326545	17326676	Peak_363564	Yes
chr1	17330905	17331577	Peak_363561	Yes
chr1	17345243	17345409	Peak_363555	No
chr1	17345497	17345771	Peak_363554	Yes
chr1	17386177	17386793	Peak_363542	Yes
chr1	17396705	17396789	Peak_363539	Yes
chr1	17398129	17398434	Peak_363534	Yes
chr1	17413775	17414758	Peak_363531	Yes
chr1	17420160	17420682	Peak_363527	Yes
chr1	17425188	17425465	Peak_363526	Yes
chr1	17426453	17426555	Peak_363525	Yes
chr1	17428274	17429099	Peak_363523	Yes
chr1	17429905	17430020	Peak_363522	No
chr1	17448485	17448632	Peak_363515	Yes
chr1	17510672	17510767	Peak_363505	Yes
chr1	17511845	17511985	Peak_363504	Yes
chr1	17516594	17516928	Peak_363501	Yes
chr1	17520077	17520571	Peak_363500	Yes
chr1	17527882	17528054	Peak_363496	Yes
chr1	17533966	17534167	Peak_363491	Yes
chr1	17546341	17546876	Peak_363486	Yes
chr1	17570466	17571890	Peak_363481	Yes
chr1	17571948	17572056	Peak_363480	Yes
chr1	17572527	17572912	Peak_363479	Yes
chr1	17573443	17574055	Peak_363478	Yes
chr1	17586564	17586644	Peak_363474	Yes
chr1	17597581	17597762	Peak_363471	Yes
chr1	17601244	17602063	Peak_363469	Yes
chr1	17633559	17633721	Peak_363463	Yes
chr1	17634525	17634896	Peak_363462	Yes
chr1	17656755	17657471	Peak_363459	Yes
chr1	17765997	17766737	Peak_363428	Yes
chr1	17767084	17767186	Peak_363427	Yes
chr1	17767831	17768210	Peak_363426	Yes
chr1	17852585	17852745	Peak_363411	Yes
chr1	17878255	17878572	Peak_363406	Yes
chr1	17885221	17885897	Peak_363404	Yes
chr1	17895649	17896551	Peak_363401	Yes
chr1	17902390	17902733	Peak_363398	Yes
chr1	17904040	17904291	Peak_363396	Yes
chr1	17908511	17908613	Peak_363393	Yes
chr1	17909751	17910163	Peak_363392	Yes
chr1	17914800	17915016	Peak_363389	Yes
chr1	17934192	17934356	Peak_363378	Yes
chr1	17939493	17939617	Peak_363376	Yes
chr1	17939692	17940053	Peak_363375	Yes
chr1	17941562	17942265	Peak_363374	Yes
chr1	17951722	17951913	Peak_363371	Yes
chr1	17955010	17955119	Peak_363370	No
chr1	17965162	17965366	Peak_363365	Yes
chr1	17970171	17970402	Peak_363363	Yes
chr1	17970549	17970743	Peak_363362	Yes
chr1	17984369	17984573	Peak_363356	Yes
chr1	17987128	17987349	Peak_363355	Yes
chr1	17995198	17995649	Peak_363352	Yes
chr1	18006048	18006246	Peak_363347	Yes
chr1	18006640	18007125	Peak_363346	Yes
chr1	18023605	18023940	Peak_363342	Yes
chr1	18032161	18032349	Peak_363340	Yes
chr1	18035862	18038953	Peak_363337	Yes
chr1	18059641	18060096	Peak_363332	Yes
chr1	18060188	18060388	Peak_363331	Yes
chr1	18071216	18071523	Peak_363328	Yes
chr1	18092301	18092610	Peak_363322	Yes
chr1	18093980	18094164	Peak_363320	Yes
chr1	18096677	18096819	Peak_363319	Yes
chr1	18096886	18097878	Peak_363318	Yes
chr1	18099445	18099815	Peak_363317	Yes
chr1	18106978	18107312	Peak_363316	Yes
chr1	18117995	18118217	Peak_363314	Yes
chr1	18132696	18133012	Peak_363311	Yes
chr1	18156134	18156407	Peak_363308	Yes
chr1	18158371	18158476	Peak_363306	Yes
chr1	18163747	18163957	Peak_363302	Yes
chr1	18184338	18184427	Peak_363297	Yes
chr1	18195755	18196011	Peak_363295	Yes
chr1	18200441	18200571	Peak_363293	Yes
chr1	18203421	18203858	Peak_363291	Yes
chr1	18212962	18213552	Peak_363290	Yes
chr1	18214305	18214810	Peak_363288	Yes
chr1	18223426	18223554	Peak_363287	Yes
chr1	18223639	18223921	Peak_363286	Yes
chr1	18244573	18244663	Peak_363281	Yes
chr1	18245230	18245344	Peak_363280	Yes
chr1	18246267	18246664	Peak_363279	Yes
chr1	18285316	18285979	Peak_363275	Yes
chr1	18294426	18294632	Peak_363273	Yes
chr1	18296052	18296344	Peak_363272	Yes
chr1	18324644	18324727	Peak_363270	No
chr1	18325116	18325325	Peak_363269	No
chr1	18371187	18371347	Peak_363255	Yes
chr1	18373747	18374052	Peak_363254	Yes
chr1	18386782	18387037	Peak_363249	Yes
chr1	18406511	18407295	Peak_363246	Yes
chr1	18431671	18431827	Peak_363242	No
chr1	18434951	18435081	Peak_363240	Yes
chr1	18471936	18472104	Peak_363229	Yes
chr1	18482560	18482731	Peak_363225	Yes
chr1	18484552	18484771	Peak_363224	Yes
chr1	18494982	18495215	Peak_363220	No
chr1	18505197	18505989	Peak_363217	Yes
chr1	18510913	18511118	Peak_363216	Yes
chr1	18517094	18517532	Peak_363213	Yes
chr1	18526970	18527119	Peak_363210	Yes
chr1	18535857	18536609	Peak_363205	Yes
chr1	18542913	18543132	Peak_363204	Yes
chr1	18543340	18543500	Peak_363203	Yes
chr1	18548075	18548413	Peak_363201	No
chr1	18553183	18553392	Peak_363200	No
chr1	18573930	18574038	Peak_363193	Yes
chr1	18583797	18584242	Peak_363189	Yes
chr1	18606095	18606766	Peak_363186	Yes
chr1	18611330	18611608	Peak_363183	Yes
chr1	18611708	18611998	Peak_363182	Yes
chr1	18616997	18617918	Peak_363181	Yes
chr1	18617952	18618077	Peak_363180	Yes
chr1	18629415	18630081	Peak_363175	Yes
chr1	18634047	18634731	Peak_363174	No
chr1	18640279	18640376	Peak_363172	Yes
chr1	18640553	18640784	Peak_363171	Yes
chr1	18640873	18641033	Peak_363170	Yes
chr1	18646012	18646099	Peak_363169	Yes
chr1	18646540	18647104	Peak_363168	Yes
chr1	18656289	18656393	Peak_363162	Yes
chr1	18656460	18656596	Peak_363161	Yes
chr1	18658281	18658396	Peak_363160	No
chr1	18662028	18662302	Peak_363158	Yes
chr1	18665312	18665721	Peak_363156	Yes
chr1	18674124	18674434	Peak_363153	Yes
chr1	18678346	18678802	Peak_363150	Yes
chr1	18686880	18687038	Peak_363148	Yes
chr1	18689887	18690040	Peak_363145	Yes
chr1	18708800	18709538	Peak_363142	Yes
chr1	18709591	18709762	Peak_363141	Yes
chr1	18716521	18716655	Peak_363140	Yes
chr1	18716913	18717294	Peak_363139	Yes
chr1	18739984	18740379	Peak_363133	Yes
chr1	18740465	18740630	Peak_363132	Yes
chr1	18792231	18792407	Peak_363125	Yes
chr1	18806679	18807728	Peak_363120	Yes
chr1	18807830	18808235	Peak_363119	Yes
chr1	18808938	18809202	Peak_363118	Yes
chr1	18812278	18812638	Peak_363117	Yes
chr1	18815212	18815663	Peak_363116	Yes
chr1	18823515	18823615	Peak_363112	Yes
chr1	18836075	18836971	Peak_363110	Yes
chr1	18861199	18861341	Peak_363104	Yes
chr1	18868833	18869211	Peak_363103	Yes
chr1	18891098	18891380	Peak_363100	Yes
chr1	18893678	18893838	Peak_363099	Yes
chr1	18899731	18899856	Peak_363095	Yes
chr1	18906824	18906965	Peak_363090	Yes
chr1	18933109	18933921	Peak_363083	Yes
chr1	18956105	18956231	Peak_363076	Yes
chr1	18956867	18957130	Peak_363074	Yes
chr1	18957189	18958313	Peak_363073	Yes
chr1	18959249	18959854	Peak_363072	Yes
chr1	18962239	18962374	Peak_363071	Yes
chr1	18966944	18967680	Peak_363070	Yes
chr1	18967842	18968067	Peak_363069	Yes
chr1	18969620	18970633	Peak_363067	Yes
chr1	18972929	18973555	Peak_363066	Yes
chr1	18973870	18974010	Peak_363065	Yes
chr1	18981704	18982161	Peak_363061	Yes
chr1	18982167	18982363	Peak_363060	Yes
chr1	18984212	18984995	Peak_363059	Yes
chr1	19018391	19018623	Peak_363045	No
chr1	19043070	19043826	Peak_363042	Yes
chr1	19050514	19050622	Peak_363040	Yes
chr1	19057112	19057338	Peak_363035	Yes
chr1	19057458	19057692	Peak_363034	Yes
chr1	19063516	19064085	Peak_363033	Yes
chr1	19066150	19066731	Peak_363032	Yes
chr1	19104726	19105164	Peak_363028	Yes
chr1	19111636	19111830	Peak_363025	Yes
chr1	19129818	19129944	Peak_363023	Yes
chr1	19132019	19132252	Peak_363020	Yes
chr1	19141022	19141551	Peak_363019	Yes
chr1	19146418	19146817	Peak_363016	Yes
chr1	19175750	19176303	Peak_363011	Yes
chr1	19198486	19198733	Peak_363008	Yes
chr1	19199181	19199267	Peak_363007	Yes
chr1	19199303	19199417	Peak_363006	Yes
chr1	19201567	19202478	Peak_363005	Yes
chr1	19206057	19206971	Peak_363002	Yes
chr1	19208421	19208911	Peak_363001	Yes
chr1	19248808	19248942	Peak_362988	Yes
chr1	19249421	19249629	Peak_362987	Yes
chr1	19254727	19254844	Peak_362983	Yes
chr1	19265056	19265588	Peak_362980	Yes
chr1	19265701	19265862	Peak_362979	Yes
chr1	19266575	19266715	Peak_362978	Yes
chr1	19267661	19269041	Peak_362977	Yes
chr1	19280211	19280469	Peak_362974	Yes
chr1	19320621	19321425	Peak_362969	Yes
chr1	19336980	19338178	Peak_362967	Yes
chr1	19340774	19341026	Peak_362966	Yes
chr1	19360263	19360789	Peak_362964	Yes
chr1	19369494	19369660	Peak_362959	Yes
chr1	19373688	19374341	Peak_362954	Yes
chr1	19375680	19376081	Peak_362951	Yes
chr1	19376136	19376256	Peak_362950	Yes
chr1	19380672	19381234	Peak_362948	Yes
chr1	19384543	19384652	Peak_362947	Yes
chr1	19402067	19402604	Peak_362938	Yes
chr1	19406182	19406421	Peak_362936	Yes
chr1	19410479	19410632	Peak_362932	No
chr1	19423179	19423405	Peak_362928	Yes
chr1	19431550	19431678	Peak_362925	No
chr1	19438768	19439341	Peak_362924	Yes
chr1	19439705	19439821	Peak_362923	Yes
chr1	19452837	19453377	Peak_362921	Yes
chr1	19465785	19465949	Peak_362920	Yes
chr1	19466276	19466567	Peak_362919	Yes
chr1	19466915	19467467	Peak_362918	Yes
chr1	19475261	19475387	Peak_362917	Yes
chr1	19475466	19476147	Peak_362916	Yes
chr1	19477022	19477137	Peak_362915	Yes
chr1	19477466	19477593	Peak_362914	No
chr1	19568555	19568824	Peak_362900	Yes
chr1	19577346	19577522	Peak_362898	Yes
chr1	19632446	19632699	Peak_362884	Yes
chr1	19651138	19651295	Peak_362881	Yes
chr1	19651514	19652239	Peak_362880	Yes
chr1	19653730	19653903	Peak_362878	Yes
chr1	19668573	19669266	Peak_362872	Yes
chr1	19670121	19670607	Peak_362871	Yes
chr1	19670682	19671524	Peak_362870	Yes
chr1	19671529	19671675	Peak_362869	Yes
chr1	19676127	19676554	Peak_362867	Yes
chr1	19678725	19679419	Peak_362866	Yes
chr1	19688275	19688474	Peak_362865	Yes
chr1	19693656	19693955	Peak_362863	Yes
chr1	19694082	19694305	Peak_362862	Yes
chr1	19697653	19698083	Peak_362859	Yes
chr1	19698485	19699230	Peak_362858	Yes
chr1	19699829	19699944	Peak_362857	Yes
chr1	19699966	19700803	Peak_362856	Yes
chr1	19700882	19701001	Peak_362855	Yes
chr1	19712230	19712645	Peak_362853	Yes
chr1	19716773	19716943	Peak_362851	Yes
chr1	19730102	19730467	Peak_362847	Yes
chr1	19732198	19732314	Peak_362846	Yes
chr1	19732333	19733339	Peak_362845	Yes
chr1	19741041	19741399	Peak_362843	Yes
chr1	19741563	19741636	Peak_362842	Yes
chr1	19742101	19742410	Peak_362841	Yes
chr1	19745996	19746177	Peak_362839	Yes
chr1	19752759	19754076	Peak_362836	Yes
chr1	19756705	19756931	Peak_362834	Yes
chr1	19759084	19759772	Peak_362833	Yes
chr1	19760320	19760640	Peak_362832	Yes
chr1	19764429	19764863	Peak_362831	Yes
chr1	19772424	19772875	Peak_362830	Yes
chr1	19792430	19793025	Peak_362822	Yes
chr1	19856112	19856531	Peak_362807	Yes
chr1	19889872	19890111	Peak_362804	Yes
chr1	19933455	19934127	Peak_362795	Yes
chr1	19946314	19946554	Peak_362792	Yes
chr1	19946618	19947010	Peak_362791	Yes
chr1	19947153	19947336	Peak_362790	Yes
chr1	19955733	19956024	Peak_362787	Yes
chr1	19956387	19956596	Peak_362786	Yes
chr1	19965610	19965868	Peak_362783	Yes
chr1	19967146	19967594	Peak_362782	Yes
chr1	19970252	19970422	Peak_362781	Yes
chr1	19977088	19977242	Peak_362775	Yes
chr1	19983192	19984242	Peak_362773	Yes
chr1	19990581	19990859	Peak_362768	Yes
chr1	19998044	19998410	Peak_362766	Yes
chr1	20005387	20005531	Peak_362765	Yes
chr1	20007250	20007413	Peak_362764	Yes
chr1	20009506	20009669	Peak_362763	Yes
chr1	20014299	20014642	Peak_362762	Yes
chr1	20035296	20035422	Peak_362759	Yes
chr1	20035695	20036045	Peak_362758	Yes
chr1	20097128	20097219	Peak_362732	Yes
chr1	20110083	20110215	Peak_362729	No
chr1	20114826	20114997	Peak_362725	No
chr1	20141082	20141193	Peak_362720	Yes
chr1	20219681	20220455	Peak_362706	Yes
chr1	20220553	20220892	Peak_362705	Yes
chr1	20234925	20235097	Peak_362704	Yes
chr1	20236988	20237699	Peak_362703	Yes
chr1	20246502	20246632	Peak_362700	Yes
chr1	20285126	20285482	Peak_362691	Yes
chr1	20444353	20444461	Peak_362667	No
chr1	20451814	20452024	Peak_362664	Yes
chr1	20467005	20467139	Peak_362662	Yes
chr1	20501567	20501721	Peak_362651	Yes
chr1	20512194	20513309	Peak_362646	Yes
chr1	20513712	20514098	Peak_362645	Yes
chr1	20514239	20514461	Peak_362644	Yes
chr1	20519283	20519626	Peak_362643	Yes
chr1	20520532	20520662	Peak_362642	Yes
chr1	20542166	20542619	Peak_362633	Yes
chr1	20546641	20546893	Peak_362630	Yes
chr1	20554268	20554380	Peak_362627	Yes
chr1	20561022	20561551	Peak_362624	Yes
chr1	20573071	20573141	Peak_362622	No
chr1	20576877	20577186	Peak_362621	Yes
chr1	20598256	20598772	Peak_362617	Yes
chr1	20602889	20603299	Peak_362614	Yes
chr1	20616896	20617810	Peak_362613	Yes
chr1	20637148	20637222	Peak_362609	Yes
chr1	20644283	20644373	Peak_362608	Yes
chr1	20647072	20647272	Peak_362607	Yes
chr1	20651627	20651805	Peak_362605	Yes
chr1	20652090	20652859	Peak_362603	Yes
chr1	20666775	20666977	Peak_362602	Yes
chr1	20670304	20671200	Peak_362601	Yes
chr1	20677228	20677343	Peak_362599	Yes
chr1	20679143	20680068	Peak_362598	Yes
chr1	20682919	20683306	Peak_362596	Yes
chr1	20683391	20683611	Peak_362595	Yes
chr1	20687781	20688106	Peak_362594	Yes
chr1	20693757	20694045	Peak_362590	Yes
chr1	20694846	20695338	Peak_362589	Yes
chr1	20695395	20695987	Peak_362588	Yes
chr1	20699430	20699649	Peak_362587	No
chr1	20699787	20700711	Peak_362586	Yes
chr1	20707002	20707996	Peak_362585	Yes
chr1	20712193	20713931	Peak_362584	Yes
chr1	20718946	20719236	Peak_362583	Yes
chr1	20728355	20728583	Peak_362582	Yes
chr1	20729196	20729814	Peak_362581	Yes
chr1	20767894	20768080	Peak_362568	Yes
chr1	20769316	20770027	Peak_362564	Yes
chr1	20771730	20771813	Peak_362562	Yes
chr1	20787807	20788053	Peak_362560	No
chr1	20797115	20797259	Peak_362559	Yes
chr1	20806698	20807083	Peak_362553	Yes
chr1	20811514	20813893	Peak_362552	Yes
chr1	20819763	20821289	Peak_362551	Yes
chr1	20838079	20838552	Peak_362546	Yes
chr1	20866849	20867130	Peak_362537	Yes
chr1	20869184	20869453	Peak_362536	No
chr1	20878829	20879374	Peak_362534	Yes
chr1	20879459	20880729	Peak_362533	Yes
chr1	20940155	20940269	Peak_362513	Yes
chr1	20979974	20980118	Peak_362503	Yes
chr1	21009163	21009318	Peak_362496	Yes
chr1	21030564	21030721	Peak_362491	Yes
chr1	21044986	21045363	Peak_362486	Yes
chr1	21050189	21050605	Peak_362485	Yes
chr1	21156670	21157002	Peak_362473	Yes
chr1	21167129	21167553	Peak_362471	Yes
chr1	21205723	21205903	Peak_362464	No
chr1	21214153	21214409	Peak_362459	Yes
chr1	21226423	21226645	Peak_362458	Yes
chr1	21238956	21239175	Peak_362453	No
chr1	21249972	21250083	Peak_362448	No
chr1	21319468	21319752	Peak_362436	Yes
chr1	21326608	21327279	Peak_362433	Yes
chr1	21327667	21327763	Peak_362432	Yes
chr1	21328497	21328690	Peak_362431	No
chr1	21360684	21360998	Peak_362424	Yes
chr1	21374826	21374981	Peak_362416	Yes
chr1	21415654	21415865	Peak_362410	Yes
chr1	21444035	21444189	Peak_362405	Yes
chr1	21444190	21444275	Peak_362404	Yes
chr1	21444286	21444534	Peak_362403	Yes
chr1	21450198	21450360	Peak_362400	Yes
chr1	21476122	21476708	Peak_362391	Yes
chr1	21496282	21496831	Peak_362385	Yes
chr1	21497190	21497984	Peak_362384	Yes
chr1	21501133	21501423	Peak_362383	Yes
chr1	21502218	21504677	Peak_362382	Yes
chr1	21508875	21509014	Peak_362381	Yes
chr1	21562681	21562838	Peak_362361	Yes
chr1	21571567	21571793	Peak_362358	Yes
chr1	21581071	21581493	Peak_362350	Yes
chr1	21605971	21606318	Peak_362339	Yes
chr1	21610988	21611652	Peak_362337	Yes
chr1	21620100	21620568	Peak_362335	Yes
chr1	21620655	21621074	Peak_362334	Yes
chr1	21625403	21625738	Peak_362331	Yes
chr1	21640607	21641887	Peak_362327	Yes
chr1	21646980	21647318	Peak_362324	Yes
chr1	21656050	21656516	Peak_362314	Yes
chr1	21665198	21665705	Peak_362310	Yes
chr1	21671309	21673422	Peak_362307	Yes
chr1	21837527	21837607	Peak_362286	Yes
chr1	21851225	21852060	Peak_362281	Yes
chr1	21866864	21867392	Peak_362275	Yes
chr1	21890435	21890858	Peak_362269	Yes
chr1	21893894	21894096	Peak_362267	Yes
chr1	21895379	21895668	Peak_362266	Yes
chr1	21917121	21917219	Peak_362261	Yes
chr1	21921647	21922496	Peak_362260	Yes
chr1	21925662	21925816	Peak_362257	Yes
chr1	21935459	21936094	Peak_362253	Yes
chr1	21936323	21936673	Peak_362252	Yes
chr1	21941032	21941672	Peak_362251	Yes
chr1	21965623	21966405	Peak_362239	Yes
chr1	21972172	21972282	Peak_362234	Yes
chr1	21976236	21976361	Peak_362232	No
chr1	21976413	21976765	Peak_362231	Yes
chr1	21980207	21980682	Peak_362227	Yes
chr1	21990365	21990583	Peak_362224	Yes
chr1	21991724	21992007	Peak_362223	Yes
chr1	21992405	21992604	Peak_362222	Yes
chr1	21994847	21996550	Peak_362221	Yes
chr1	21998554	21998739	Peak_362220	Yes
chr1	22020174	22020372	Peak_362212	Yes
chr1	22078750	22079005	Peak_362201	Yes
chr1	22108481	22108613	Peak_362197	Yes
chr1	22108742	22108953	Peak_362196	Yes
chr1	22108971	22110430	Peak_362195	Yes
chr1	22138589	22138788	Peak_362194	Yes
chr1	22148227	22148322	Peak_362190	Yes
chr1	22149800	22150002	Peak_362188	Yes
chr1	22155503	22155627	Peak_362187	Yes
chr1	22157975	22158148	Peak_362186	Yes
chr1	22160273	22160384	Peak_362185	Yes
chr1	22161119	22162130	Peak_362184	Yes
chr1	22165475	22165615	Peak_362183	Yes
chr1	22165731	22165834	Peak_362182	Yes
chr1	22169357	22169505	Peak_362181	Yes
chr1	22170590	22170751	Peak_362180	Yes
chr1	22181154	22181365	Peak_362176	Yes
chr1	22181849	22181970	Peak_362175	Yes
chr1	22186149	22186457	Peak_362174	Yes
chr1	22191779	22192024	Peak_362173	Yes
chr1	22202949	22203611	Peak_362169	Yes
chr1	22206864	22207121	Peak_362168	Yes
chr1	22207838	22207977	Peak_362167	Yes
chr1	22225258	22225684	Peak_362157	Yes
chr1	22227677	22228941	Peak_362155	Yes
chr1	22230931	22231074	Peak_362154	Yes
chr1	22236068	22236817	Peak_362152	Yes
chr1	22237332	22237562	Peak_362150	Yes
chr1	22240751	22241150	Peak_362148	Yes
chr1	22241400	22241769	Peak_362147	Yes
chr1	22241988	22242087	Peak_362146	Yes
chr1	22243257	22243611	Peak_362145	Yes
chr1	22246218	22246755	Peak_362144	Yes
chr1	22247429	22247619	Peak_362143	Yes
chr1	22253315	22253987	Peak_362139	Yes
chr1	22257649	22257921	Peak_362137	Yes
chr1	22265377	22265810	Peak_362133	Yes
chr1	22270881	22271024	Peak_362130	Yes
chr1	22282955	22283044	Peak_362122	Yes
chr1	22303161	22303617	Peak_362113	Yes
chr1	22315896	22316082	Peak_362111	No
chr1	22431909	22432091	Peak_362079	Yes
chr1	22432188	22432459	Peak_362078	Yes
chr1	22433050	22433295	Peak_362077	Yes
chr1	22434554	22435146	Peak_362075	Yes
chr1	22435271	22435492	Peak_362074	Yes
chr1	22440482	22441392	Peak_362072	Yes
chr1	22446737	22446867	Peak_362069	Yes
chr1	22447811	22447986	Peak_362068	Yes
chr1	22449985	22450143	Peak_362067	Yes
chr1	22459114	22459415	Peak_362065	Yes
chr1	22459597	22460373	Peak_362064	Yes
chr1	22464530	22465058	Peak_362062	Yes
chr1	22465111	22465403	Peak_362061	Yes
chr1	22467266	22467503	Peak_362060	Yes
chr1	22468112	22468708	Peak_362059	Yes
chr1	22468759	22469196	Peak_362058	Yes
chr1	22469252	22470404	Peak_362057	Yes
chr1	22470607	22470784	Peak_362056	Yes
chr1	22480344	22480973	Peak_362052	Yes
chr1	22495850	22495958	Peak_362049	No
chr1	22511785	22512408	Peak_362044	Yes
chr1	22529622	22530058	Peak_362042	Yes
chr1	22531171	22532136	Peak_362041	Yes
chr1	22533944	22534676	Peak_362040	Yes
chr1	22535073	22535378	Peak_362039	Yes
chr1	22537311	22537458	Peak_362037	Yes
chr1	22555209	22555343	Peak_362032	Yes
chr1	22555402	22555560	Peak_362031	Yes
chr1	22570522	22570708	Peak_362025	Yes
chr1	22572202	22572649	Peak_362024	Yes
chr1	22577155	22577298	Peak_362023	Yes
chr1	22577892	22578039	Peak_362022	Yes
chr1	22578830	22579079	Peak_362021	Yes
chr1	22583521	22584699	Peak_362019	Yes
chr1	22585964	22586369	Peak_362018	Yes
chr1	22587683	22588323	Peak_362017	Yes
chr1	22588822	22589556	Peak_362016	Yes
chr1	22614690	22614972	Peak_362009	Yes
chr1	22654614	22655031	Peak_362004	Yes
chr1	22655152	22655655	Peak_362003	Yes
chr1	22658033	22658133	Peak_362002	Yes
chr1	22661417	22661695	Peak_362000	Yes
chr1	22674776	22675333	Peak_361997	Yes
chr1	22705913	22706458	Peak_361993	Yes
chr1	22712467	22712676	Peak_361992	Yes
chr1	22715743	22715900	Peak_361990	Yes
chr1	22734550	22734721	Peak_361986	Yes
chr1	22741402	22741940	Peak_361983	Yes
chr1	22742890	22743418	Peak_361982	Yes
chr1	22748348	22748829	Peak_361979	Yes
chr1	22752410	22752515	Peak_361977	No
chr1	22774274	22774827	Peak_361976	Yes
chr1	22781819	22782268	Peak_361973	Yes
chr1	22787273	22787961	Peak_361971	Yes
chr1	22789580	22790319	Peak_361970	Yes
chr1	22800978	22801376	Peak_361968	Yes
chr1	22802471	22802588	Peak_361967	No
chr1	22819328	22819588	Peak_361961	Yes
chr1	22828646	22828885	Peak_361959	Yes
chr1	22832422	22832648	Peak_361958	Yes
chr1	22841610	22841773	Peak_361955	No
chr1	22877947	22878811	Peak_361947	Yes
chr1	22881372	22881684	Peak_361946	Yes
chr1	22881738	22882783	Peak_361945	Yes
chr1	22889379	22890620	Peak_361943	Yes
chr1	22890699	22890967	Peak_361942	Yes
chr1	22898984	22900001	Peak_361941	Yes
chr1	22903208	22903691	Peak_361940	Yes
chr1	22906128	22906209	Peak_361939	Yes
chr1	22909375	22909800	Peak_361937	Yes
chr1	22922668	22922913	Peak_361934	No
chr1	22929217	22929429	Peak_361932	Yes
chr1	22929639	22929790	Peak_361931	Yes
chr1	22929857	22930035	Peak_361930	Yes
chr1	22933162	22933388	Peak_361926	Yes
chr1	22935440	22935553	Peak_361924	No
chr1	22939402	22939527	Peak_361923	Yes
chr1	22943352	22943636	Peak_361920	Yes
chr1	22945494	22945706	Peak_361919	Yes
chr1	22945822	22947058	Peak_361918	Yes
chr1	22962913	22963349	Peak_361914	Yes
chr1	22999516	23000681	Peak_361905	Yes
chr1	23001626	23001815	Peak_361904	Yes
chr1	23003412	23004066	Peak_361903	Yes
chr1	23004677	23004795	Peak_361901	Yes
chr1	23025330	23026259	Peak_361898	Yes
chr1	23026286	23026399	Peak_361897	Yes
chr1	23030110	23030230	Peak_361894	Yes
chr1	23036145	23038343	Peak_361892	Yes
chr1	23039143	23039512	Peak_361891	Yes
chr1	23049864	23050070	Peak_361887	Yes
chr1	23055371	23055691	Peak_361883	Yes
chr1	23056273	23057078	Peak_361882	Yes
chr1	23057305	23057510	Peak_361881	Yes
chr1	23057836	23058819	Peak_361880	Yes
chr1	23062838	23063659	Peak_361879	Yes
chr1	23063872	23064124	Peak_361878	Yes
chr1	23066101	23066491	Peak_361877	Yes
chr1	23067978	23068119	Peak_361874	Yes
chr1	23073704	23074079	Peak_361871	Yes
chr1	23076769	23077195	Peak_361870	Yes
chr1	23077689	23077999	Peak_361868	Yes
chr1	23082664	23082819	Peak_361865	Yes
chr1	23082863	23083116	Peak_361864	Yes
chr1	23095543	23095793	Peak_361860	Yes
chr1	23096346	23097333	Peak_361859	Yes
chr1	23098422	23099172	Peak_361858	Yes
chr1	23100021	23101175	Peak_361857	Yes
chr1	23101900	23102329	Peak_361855	Yes
chr1	23102518	23102692	Peak_361854	Yes
chr1	23102978	23103096	Peak_361853	Yes
chr1	23103332	23103546	Peak_361852	Yes
chr1	23105088	23105438	Peak_361851	Yes
chr1	23105459	23105654	Peak_361850	Yes
chr1	23108708	23110056	Peak_361849	Yes
chr1	23116773	23117638	Peak_361846	Yes
chr1	23121942	23122132	Peak_361843	Yes
chr1	23126115	23126292	Peak_361842	Yes
chr1	23126386	23127083	Peak_361841	Yes
chr1	23127636	23128871	Peak_361840	Yes
chr1	23141951	23142488	Peak_361834	Yes
chr1	23143593	23143712	Peak_361832	Yes
chr1	23146024	23146266	Peak_361829	Yes
chr1	23149147	23149458	Peak_361828	Yes
chr1	23150866	23151495	Peak_361827	Yes
chr1	23154898	23155228	Peak_361824	Yes
chr1	23155415	23155492	Peak_361823	Yes
chr1	23158850	23158999	Peak_361820	Yes
chr1	23159079	23159523	Peak_361819	Yes
chr1	23162361	23162464	Peak_361816	Yes
chr1	23163836	23163968	Peak_361814	Yes
chr1	23167937	23169088	Peak_361810	Yes
chr1	23171390	23171606	Peak_361808	Yes
chr1	23176522	23176958	Peak_361804	Yes
chr1	23182554	23182955	Peak_361800	Yes
chr1	23186656	23186875	Peak_361798	Yes
chr1	23196645	23197107	Peak_361793	Yes
chr1	23202940	23203665	Peak_361791	Yes
chr1	23208831	23209014	Peak_361788	Yes
chr1	23218717	23219515	Peak_361784	Yes
chr1	23233313	23233484	Peak_361780	Yes
chr1	23285150	23285360	Peak_361771	Yes
chr1	23286305	23286404	Peak_361769	Yes
chr1	23340327	23340542	Peak_361763	Yes
chr1	23347094	23347257	Peak_361761	Yes
chr1	23395358	23395623	Peak_361753	No
chr1	23411871	23412490	Peak_361748	Yes
chr1	23414142	23414453	Peak_361747	Yes
chr1	23415386	23415479	Peak_361746	Yes
chr1	23426708	23427070	Peak_361744	Yes
chr1	23448875	23449138	Peak_361743	Yes
chr1	23453165	23453331	Peak_361742	Yes
chr1	23466839	23467062	Peak_330257	Yes
chr1	23501028	23501312	Peak_361738	Yes
chr1	23514411	23514629	Peak_361734	Yes
chr1	23521304	23521476	Peak_361730	Yes
chr1	23521609	23521870	Peak_361729	Yes
chr1	23543325	23544506	Peak_361722	Yes
chr1	23546087	23546208	Peak_361720	Yes
chr1	23551939	23552036	Peak_361717	Yes
chr1	23570947	23571050	Peak_361713	Yes
chr1	23586537	23586783	Peak_361712	Yes
chr1	23645576	23645746	Peak_361702	No
chr1	23649994	23650117	Peak_361701	Yes
chr1	23670126	23671632	Peak_361697	Yes
chr1	23694416	23695970	Peak_361692	Yes
chr1	23696224	23696531	Peak_361691	Yes
chr1	23713833	23713929	Peak_361688	Yes
chr1	23720445	23720531	Peak_361685	Yes
chr1	23721172	23721412	Peak_361684	Yes
chr1	23748661	23749272	Peak_361677	Yes
chr1	23750665	23751869	Peak_361674	Yes
chr1	23752546	23752693	Peak_361673	Yes
chr1	23753087	23754079	Peak_361672	Yes
chr1	23759634	23759762	Peak_361670	Yes
chr1	23760111	23760193	Peak_361669	Yes
chr1	23763462	23763842	Peak_361666	Yes
chr1	23792656	23792799	Peak_361663	Yes
chr1	23833547	23834253	Peak_361646	Yes
chr1	23836501	23836574	Peak_361645	Yes
chr1	23852039	23852476	Peak_361636	Yes
chr1	23854681	23855262	Peak_361635	Yes
chr1	23856909	23858139	Peak_361634	Yes
chr1	23870182	23872311	Peak_361630	Yes
chr1	23875291	23875554	Peak_361629	Yes
chr1	23879005	23880062	Peak_361628	Yes
chr1	23880914	23881188	Peak_361627	Yes
chr1	23882245	23882615	Peak_361625	Yes
chr1	23885554	23886473	Peak_361623	Yes
chr1	23888582	23889212	Peak_361622	Yes
chr1	23907824	23908123	Peak_361615	Yes
chr1	23912007	23912584	Peak_361614	Yes
chr1	23918095	23918759	Peak_361612	Yes
chr1	23919912	23920489	Peak_361611	Yes
chr1	23938452	23938773	Peak_361604	Yes
chr1	23945808	23946527	Peak_361598	Yes
chr1	23946608	23946801	Peak_361597	Yes
chr1	23976849	23977204	Peak_361593	Yes
chr1	24087160	24087352	Peak_361581	Yes
chr1	24143971	24144101	Peak_361562	Yes
chr1	24147072	24147208	Peak_361561	Yes
chr1	24148473	24148701	Peak_361559	Yes
chr1	24171779	24171918	Peak_361555	Yes
chr1	24172197	24172497	Peak_361554	Yes
chr1	24193740	24195595	Peak_361544	Yes
chr1	24196379	24197016	Peak_361542	Yes
chr1	24379423	24379535	Peak_361509	Yes
chr1	24381504	24381741	Peak_361507	Yes
chr1	24386298	24386478	Peak_361504	No
chr1	24387384	24387515	Peak_361503	Yes
[truncated: 188,463 more rows]
