# Supplementary material for: An atlas of dynamic chromatin landscapes in mouse fetal development
Source: Nature. 2020 Jul 29;583(7818):744–51. doi: 10.1038/s41586-020-2093-3 (PMC7398618; doi:10.1038/s41586-020-2093-3)
Supplement: Supplementary file 8 — ENCODE accession identifiers for ATAC-seq and ChIP-seq experiments included in this study. [file 41586_2020_2093_MOESM8_ESM.xlsx]

## Sheet: Sheet1
encode_experiment_accession	assay	target	tissue	stage
ENCSR151APL	ChIP-seq	H3K27ac	embryonic facial prominence	e10.5
ENCSR401GRX	ChIP-seq	H3K27ac	embryonic facial prominence	e11.5
ENCSR813SCQ	ChIP-seq	H3K27ac	embryonic facial prominence	e12.5
ENCSR420MUV	ChIP-seq	H3K27ac	embryonic facial prominence	e13.5
ENCSR481SGM	ChIP-seq	H3K27ac	embryonic facial prominence	e14.5
ENCSR382DRK	ChIP-seq	H3K27ac	embryonic facial prominence	e15.5
ENCSR825ZJV	ChIP-seq	H3K27ac	forebrain	e10.5
ENCSR275KPI	ChIP-seq	H3K27ac	forebrain	e11.5
ENCSR966AIB	ChIP-seq	H3K27ac	forebrain	e12.5
ENCSR311YPF	ChIP-seq	H3K27ac	forebrain	e13.5
ENCSR320EEW	ChIP-seq	H3K27ac	forebrain	e14.5
ENCSR691NQH	ChIP-seq	H3K27ac	forebrain	e15.5
ENCSR428OEK	ChIP-seq	H3K27ac	forebrain	e16.5
ENCSR094TTT	ChIP-seq	H3K27ac	forebrain	p0
ENCSR582SPN	ChIP-seq	H3K27ac	heart	e10.5
ENCSR222IHX	ChIP-seq	H3K27ac	heart	e11.5
ENCSR123MLY	ChIP-seq	H3K27ac	heart	e12.5
ENCSR699XHY	ChIP-seq	H3K27ac	heart	e13.5
ENCSR360ANE	ChIP-seq	H3K27ac	heart	e14.5
ENCSR574VME	ChIP-seq	H3K27ac	heart	e15.5
ENCSR846PJO	ChIP-seq	H3K27ac	heart	e16.5
ENCSR675HDX	ChIP-seq	H3K27ac	heart	p0
ENCSR594JGI	ChIP-seq	H3K27ac	hindbrain	e10.5
ENCSR129LAP	ChIP-seq	H3K27ac	hindbrain	e11.5
ENCSR784TLR	ChIP-seq	H3K27ac	hindbrain	e12.5
ENCSR344HHI	ChIP-seq	H3K27ac	hindbrain	e13.5
ENCSR054JHZ	ChIP-seq	H3K27ac	hindbrain	e14.5
ENCSR066XFL	ChIP-seq	H3K27ac	hindbrain	e15.5
ENCSR797EYS	ChIP-seq	H3K27ac	hindbrain	e16.5
ENCSR332JYZ	ChIP-seq	H3K27ac	hindbrain	p0
ENCSR424END	ChIP-seq	H3K27ac	intestine	e14.5
ENCSR599GVS	ChIP-seq	H3K27ac	intestine	e15.5
ENCSR639DND	ChIP-seq	H3K27ac	intestine	e16.5
ENCSR642VYW	ChIP-seq	H3K27ac	intestine	p0
ENCSR057SHA	ChIP-seq	H3K27ac	kidney	e14.5
ENCSR711SVB	ChIP-seq	H3K27ac	kidney	e15.5
ENCSR357JII	ChIP-seq	H3K27ac	kidney	e16.5
ENCSR140YPL	ChIP-seq	H3K27ac	kidney	p0
ENCSR863VHE	ChIP-seq	H3K27ac	limb	e10.5
ENCSR897WBY	ChIP-seq	H3K27ac	limb	e11.5
ENCSR737QWV	ChIP-seq	H3K27ac	limb	e12.5
ENCSR905FFU	ChIP-seq	H3K27ac	limb	e13.5
ENCSR021ALF	ChIP-seq	H3K27ac	limb	e14.5
ENCSR988BRP	ChIP-seq	H3K27ac	limb	e15.5
ENCSR058DOA	ChIP-seq	H3K27ac	liver	e11.5
ENCSR136GMT	ChIP-seq	H3K27ac	liver	e12.5
ENCSR175KBJ	ChIP-seq	H3K27ac	liver	e13.5
ENCSR075SNV	ChIP-seq	H3K27ac	liver	e14.5
ENCSR479LFP	ChIP-seq	H3K27ac	liver	e15.5
ENCSR802RET	ChIP-seq	H3K27ac	liver	e16.5
ENCSR616TJM	ChIP-seq	H3K27ac	liver	p0
ENCSR452WYC	ChIP-seq	H3K27ac	lung	e14.5
ENCSR895BMP	ChIP-seq	H3K27ac	lung	e15.5
ENCSR140UEX	ChIP-seq	H3K27ac	lung	e16.5
ENCSR884MYD	ChIP-seq	H3K27ac	lung	p0
ENCSR989LUY	ChIP-seq	H3K27ac	midbrain	e10.5
ENCSR088UKA	ChIP-seq	H3K27ac	midbrain	e11.5
ENCSR252ONR	ChIP-seq	H3K27ac	midbrain	e12.5
ENCSR671NSS	ChIP-seq	H3K27ac	midbrain	e13.5
ENCSR254AHA	ChIP-seq	H3K27ac	midbrain	e14.5
ENCSR428GHF	ChIP-seq	H3K27ac	midbrain	e15.5
ENCSR553IWV	ChIP-seq	H3K27ac	midbrain	e16.5
ENCSR672ZXY	ChIP-seq	H3K27ac	midbrain	p0
ENCSR531RZS	ChIP-seq	H3K27ac	neural tube	e11.5
ENCSR891SAW	ChIP-seq	H3K27ac	neural tube	e12.5
ENCSR289SWJ	ChIP-seq	H3K27ac	neural tube	e13.5
ENCSR265NBM	ChIP-seq	H3K27ac	neural tube	e14.5
ENCSR241BSK	ChIP-seq	H3K27ac	neural tube	e15.5
ENCSR316CNR	ChIP-seq	H3K27ac	stomach	e14.5
ENCSR929SEW	ChIP-seq	H3K27ac	stomach	e15.5
ENCSR546ANT	ChIP-seq	H3K27ac	stomach	e16.5
ENCSR346FJG	ChIP-seq	H3K27ac	stomach	p0
ENCSR285IQN	ChIP-seq	H3K27me3	embryonic facial prominence	e10.5
ENCSR701GKO	ChIP-seq	H3K27me3	embryonic facial prominence	e11.5
ENCSR257GTR	ChIP-seq	H3K27me3	embryonic facial prominence	e12.5
ENCSR008WOQ	ChIP-seq	H3K27me3	embryonic facial prominence	e13.5
ENCSR457HDY	ChIP-seq	H3K27me3	embryonic facial prominence	e14.5
ENCSR061DPP	ChIP-seq	H3K27me3	embryonic facial prominence	e15.5
ENCSR735VEJ	ChIP-seq	H3K27me3	forebrain	e10.5
ENCSR944XPB	ChIP-seq	H3K27me3	forebrain	e11.5
ENCSR297CHD	ChIP-seq	H3K27me3	forebrain	e12.5
ENCSR736GVO	ChIP-seq	H3K27me3	forebrain	e13.5
ENCSR831YAX	ChIP-seq	H3K27me3	forebrain	e14.5
ENCSR564XSR	ChIP-seq	H3K27me3	forebrain	e15.5
ENCSR658BBG	ChIP-seq	H3K27me3	forebrain	e16.5
ENCSR070MOK	ChIP-seq	H3K27me3	forebrain	p0
ENCSR266JQW	ChIP-seq	H3K27me3	heart	e10.5
ENCSR963OLG	ChIP-seq	H3K27me3	heart	e11.5
ENCSR122HLY	ChIP-seq	H3K27me3	heart	e12.5
ENCSR380BBL	ChIP-seq	H3K27me3	heart	e13.5
ENCSR357OED	ChIP-seq	H3K27me3	heart	e14.5
ENCSR437NPG	ChIP-seq	H3K27me3	heart	e15.5
ENCSR781ORQ	ChIP-seq	H3K27me3	heart	e16.5
ENCSR790LOX	ChIP-seq	H3K27me3	heart	p0
ENCSR984OHL	ChIP-seq	H3K27me3	hindbrain	e10.5
ENCSR375GSG	ChIP-seq	H3K27me3	hindbrain	e11.5
ENCSR302HOJ	ChIP-seq	H3K27me3	hindbrain	e12.5
ENCSR837SKW	ChIP-seq	H3K27me3	hindbrain	e13.5
ENCSR953LFI	ChIP-seq	H3K27me3	hindbrain	e14.5
ENCSR259KYK	ChIP-seq	H3K27me3	hindbrain	e15.5
ENCSR046SWI	ChIP-seq	H3K27me3	hindbrain	e16.5
ENCSR308TAV	ChIP-seq	H3K27me3	hindbrain	p0
ENCSR014YAY	ChIP-seq	H3K27me3	intestine	e14.5
ENCSR871KVM	ChIP-seq	H3K27me3	intestine	e15.5
ENCSR515XWH	ChIP-seq	H3K27me3	intestine	e16.5
ENCSR389EYR	ChIP-seq	H3K27me3	intestine	p0
ENCSR399UVI	ChIP-seq	H3K27me3	kidney	e14.5
ENCSR740DYF	ChIP-seq	H3K27me3	kidney	e15.5
ENCSR607QZE	ChIP-seq	H3K27me3	kidney	e16.5
ENCSR564JKR	ChIP-seq	H3K27me3	kidney	p0
ENCSR906RTN	ChIP-seq	H3K27me3	limb	e10.5
ENCSR085EYQ	ChIP-seq	H3K27me3	limb	e11.5
ENCSR229LTY	ChIP-seq	H3K27me3	limb	e12.5
ENCSR709CLU	ChIP-seq	H3K27me3	limb	e13.5
ENCSR765SJF	ChIP-seq	H3K27me3	limb	e14.5
ENCSR231CHC	ChIP-seq	H3K27me3	limb	e15.5
ENCSR244KCW	ChIP-seq	H3K27me3	liver	e11.5
ENCSR642ZLN	ChIP-seq	H3K27me3	liver	e12.5
ENCSR550QED	ChIP-seq	H3K27me3	liver	e13.5
ENCSR337XUK	ChIP-seq	H3K27me3	liver	e14.5
ENCSR570HJI	ChIP-seq	H3K27me3	liver	e15.5
ENCSR135QMP	ChIP-seq	H3K27me3	liver	e16.5
ENCSR973UGS	ChIP-seq	H3K27me3	liver	p0
ENCSR148IGO	ChIP-seq	H3K27me3	lung	e14.5
ENCSR861MUP	ChIP-seq	H3K27me3	lung	e15.5
ENCSR758FWH	ChIP-seq	H3K27me3	lung	e16.5
ENCSR025AOC	ChIP-seq	H3K27me3	lung	p0
ENCSR966TCN	ChIP-seq	H3K27me3	midbrain	e10.5
ENCSR545BRW	ChIP-seq	H3K27me3	midbrain	e11.5
ENCSR104PWP	ChIP-seq	H3K27me3	midbrain	e12.5
ENCSR129OJN	ChIP-seq	H3K27me3	midbrain	e13.5
ENCSR929GXP	ChIP-seq	H3K27me3	midbrain	e14.5
ENCSR857GQI	ChIP-seq	H3K27me3	midbrain	e15.5
ENCSR465TIZ	ChIP-seq	H3K27me3	midbrain	e16.5
ENCSR340ROY	ChIP-seq	H3K27me3	midbrain	p0
ENCSR240OUM	ChIP-seq	H3K27me3	neural tube	e11.5
ENCSR375RUA	ChIP-seq	H3K27me3	neural tube	e12.5
ENCSR580MEU	ChIP-seq	H3K27me3	neural tube	e13.5
ENCSR099BYW	ChIP-seq	H3K27me3	neural tube	e14.5
ENCSR928IYZ	ChIP-seq	H3K27me3	neural tube	e15.5
ENCSR064DGY	ChIP-seq	H3K27me3	stomach	e14.5
ENCSR282GAG	ChIP-seq	H3K27me3	stomach	e15.5
ENCSR946JEA	ChIP-seq	H3K27me3	stomach	e16.5
ENCSR969CPK	ChIP-seq	H3K27me3	stomach	p0
ENCSR538DPG	ChIP-seq	H3K36me3	embryonic facial prominence	e10.5
ENCSR027DMG	ChIP-seq	H3K36me3	embryonic facial prominence	e11.5
ENCSR582IBX	ChIP-seq	H3K36me3	embryonic facial prominence	e12.5
ENCSR447BVY	ChIP-seq	H3K36me3	embryonic facial prominence	e13.5
ENCSR604DCI	ChIP-seq	H3K36me3	embryonic facial prominence	e14.5
ENCSR606AJV	ChIP-seq	H3K36me3	embryonic facial prominence	e15.5
ENCSR558NWQ	ChIP-seq	H3K36me3	forebrain	e10.5
ENCSR066LZB	ChIP-seq	H3K36me3	forebrain	e11.5
ENCSR345DDI	ChIP-seq	H3K36me3	forebrain	e12.5
ENCSR087JEN	ChIP-seq	H3K36me3	forebrain	e13.5
ENCSR227UTY	ChIP-seq	H3K36me3	forebrain	e14.5
ENCSR437SFX	ChIP-seq	H3K36me3	forebrain	e15.5
ENCSR352AWJ	ChIP-seq	H3K36me3	forebrain	e16.5
ENCSR069TDC	ChIP-seq	H3K36me3	forebrain	p0
ENCSR328WMV	ChIP-seq	H3K36me3	heart	e10.5
ENCSR631KAJ	ChIP-seq	H3K36me3	heart	e11.5
ENCSR840QFC	ChIP-seq	H3K36me3	heart	e12.5
ENCSR239TSZ	ChIP-seq	H3K36me3	heart	e13.5
ENCSR641EME	ChIP-seq	H3K36me3	heart	e14.5
ENCSR560CIG	ChIP-seq	H3K36me3	heart	e15.5
ENCSR467UGM	ChIP-seq	H3K36me3	heart	e16.5
ENCSR235JCY	ChIP-seq	H3K36me3	heart	p0
ENCSR962MBB	ChIP-seq	H3K36me3	hindbrain	e10.5
ENCSR175QZX	ChIP-seq	H3K36me3	hindbrain	e11.5
ENCSR508HYL	ChIP-seq	H3K36me3	hindbrain	e12.5
ENCSR972MUO	ChIP-seq	H3K36me3	hindbrain	e13.5
ENCSR066XXZ	ChIP-seq	H3K36me3	hindbrain	e14.5
ENCSR809NWL	ChIP-seq	H3K36me3	hindbrain	e15.5
ENCSR864OWV	ChIP-seq	H3K36me3	hindbrain	e16.5
ENCSR458PAO	ChIP-seq	H3K36me3	hindbrain	p0
ENCSR953KTY	ChIP-seq	H3K36me3	intestine	e14.5
ENCSR919DDC	ChIP-seq	H3K36me3	intestine	e15.5
ENCSR272XPJ	ChIP-seq	H3K36me3	intestine	e16.5
ENCSR483KOD	ChIP-seq	H3K36me3	intestine	p0
ENCSR425FLT	ChIP-seq	H3K36me3	kidney	e14.5
ENCSR455UTX	ChIP-seq	H3K36me3	kidney	e15.5
ENCSR121BWA	ChIP-seq	H3K36me3	kidney	e16.5
ENCSR362PBD	ChIP-seq	H3K36me3	kidney	p0
ENCSR242PHH	ChIP-seq	H3K36me3	limb	e10.5
ENCSR871YCT	ChIP-seq	H3K36me3	limb	e11.5
ENCSR233LBT	ChIP-seq	H3K36me3	limb	e12.5
ENCSR639IQR	ChIP-seq	H3K36me3	limb	e13.5
ENCSR871CGP	ChIP-seq	H3K36me3	limb	e14.5
ENCSR264HHL	ChIP-seq	H3K36me3	limb	e15.5
ENCSR932BNP	ChIP-seq	H3K36me3	liver	e11.5
ENCSR295ZLV	ChIP-seq	H3K36me3	liver	e12.5
ENCSR037HCS	ChIP-seq	H3K36me3	liver	e13.5
ENCSR670YXP	ChIP-seq	H3K36me3	liver	e14.5
ENCSR510CGB	ChIP-seq	H3K36me3	liver	e15.5
ENCSR569DBO	ChIP-seq	H3K36me3	liver	e16.5
ENCSR656AMS	ChIP-seq	H3K36me3	liver	p0
ENCSR108TWE	ChIP-seq	H3K36me3	lung	e14.5
ENCSR776RJR	ChIP-seq	H3K36me3	lung	e15.5
ENCSR969NXN	ChIP-seq	H3K36me3	lung	e16.5
ENCSR250LXH	ChIP-seq	H3K36me3	lung	p0
ENCSR747ZXL	ChIP-seq	H3K36me3	midbrain	e10.5
ENCSR535NVF	ChIP-seq	H3K36me3	midbrain	e11.5
ENCSR764UIE	ChIP-seq	H3K36me3	midbrain	e12.5
ENCSR066WUD	ChIP-seq	H3K36me3	midbrain	e13.5
ENCSR702JYV	ChIP-seq	H3K36me3	midbrain	e14.5
ENCSR487RAU	ChIP-seq	H3K36me3	midbrain	e15.5
ENCSR205XBQ	ChIP-seq	H3K36me3	midbrain	e16.5
ENCSR951UWY	ChIP-seq	H3K36me3	midbrain	p0
ENCSR445UYH	ChIP-seq	H3K36me3	neural tube	e11.5
ENCSR094QZC	ChIP-seq	H3K36me3	neural tube	e12.5
ENCSR107SLP	ChIP-seq	H3K36me3	neural tube	e13.5
ENCSR776QRL	ChIP-seq	H3K36me3	neural tube	e14.5
ENCSR207UMX	ChIP-seq	H3K36me3	neural tube	e15.5
ENCSR581FAT	ChIP-seq	H3K36me3	stomach	e14.5
ENCSR599PKR	ChIP-seq	H3K36me3	stomach	e15.5
ENCSR872WGX	ChIP-seq	H3K36me3	stomach	e16.5
ENCSR516KLO	ChIP-seq	H3K36me3	stomach	p0
ENCSR914QGB	ChIP-seq	H3K4me1	embryonic facial prominence	e10.5
ENCSR511WPK	ChIP-seq	H3K4me1	embryonic facial prominence	e11.5
ENCSR645ETR	ChIP-seq	H3K4me1	embryonic facial prominence	e12.5
ENCSR258AED	ChIP-seq	H3K4me1	embryonic facial prominence	e13.5
ENCSR972WEN	ChIP-seq	H3K4me1	embryonic facial prominence	e14.5
ENCSR091WNX	ChIP-seq	H3K4me1	embryonic facial prominence	e15.5
ENCSR992SHK	ChIP-seq	H3K4me1	forebrain	e10.5
ENCSR975QSF	ChIP-seq	H3K4me1	forebrain	e11.5
ENCSR243JOL	ChIP-seq	H3K4me1	forebrain	e12.5
ENCSR496TBX	ChIP-seq	H3K4me1	forebrain	e13.5
ENCSR556ZUY	ChIP-seq	H3K4me1	forebrain	e14.5
ENCSR875KRK	ChIP-seq	H3K4me1	forebrain	e15.5
ENCSR141ZQF	ChIP-seq	H3K4me1	forebrain	e16.5
ENCSR465PLB	ChIP-seq	H3K4me1	forebrain	p0
ENCSR782DGO	ChIP-seq	H3K4me1	heart	e10.5
ENCSR886IHN	ChIP-seq	H3K4me1	heart	e11.5
ENCSR442RYY	ChIP-seq	H3K4me1	heart	e12.5
ENCSR663VWL	ChIP-seq	H3K4me1	heart	e13.5
ENCSR080GQM	ChIP-seq	H3K4me1	heart	e14.5
ENCSR339LMJ	ChIP-seq	H3K4me1	heart	e15.5
ENCSR251LFV	ChIP-seq	H3K4me1	heart	e16.5
ENCSR488OCA	ChIP-seq	H3K4me1	heart	p0
ENCSR608QBO	ChIP-seq	H3K4me1	hindbrain	e10.5
ENCSR695FPP	ChIP-seq	H3K4me1	hindbrain	e11.5
ENCSR014MXQ	ChIP-seq	H3K4me1	hindbrain	e12.5
ENCSR349NIS	ChIP-seq	H3K4me1	hindbrain	e13.5
ENCSR417TXZ	ChIP-seq	H3K4me1	hindbrain	e14.5
ENCSR921ILW	ChIP-seq	H3K4me1	hindbrain	e15.5
ENCSR257JSX	ChIP-seq	H3K4me1	hindbrain	e16.5
ENCSR617VBE	ChIP-seq	H3K4me1	hindbrain	p0
ENCSR157LYR	ChIP-seq	H3K4me1	intestine	e14.5
ENCSR051CUH	ChIP-seq	H3K4me1	intestine	e15.5
ENCSR829YGD	ChIP-seq	H3K4me1	intestine	e16.5
ENCSR159RVN	ChIP-seq	H3K4me1	intestine	p0
ENCSR196ENU	ChIP-seq	H3K4me1	kidney	e14.5
ENCSR436FYE	ChIP-seq	H3K4me1	kidney	e15.5
ENCSR883ASH	ChIP-seq	H3K4me1	kidney	e16.5
ENCSR674PZU	ChIP-seq	H3K4me1	kidney	p0
ENCSR238SGC	ChIP-seq	H3K4me1	limb	e10.5
ENCSR548BCO	ChIP-seq	H3K4me1	limb	e11.5
ENCSR751AAB	ChIP-seq	H3K4me1	limb	e12.5
ENCSR426EZM	ChIP-seq	H3K4me1	limb	e13.5
ENCSR529ERN	ChIP-seq	H3K4me1	limb	e14.5
ENCSR810EOA	ChIP-seq	H3K4me1	limb	e15.5
ENCSR419MSI	ChIP-seq	H3K4me1	liver	e11.5
ENCSR770OXU	ChIP-seq	H3K4me1	liver	e12.5
ENCSR045NOD	ChIP-seq	H3K4me1	liver	e13.5
ENCSR234ISO	ChIP-seq	H3K4me1	liver	e14.5
ENCSR133EGP	ChIP-seq	H3K4me1	liver	e15.5
ENCSR487OLC	ChIP-seq	H3K4me1	liver	e16.5
ENCSR308GFM	ChIP-seq	H3K4me1	liver	p0
ENCSR825OWH	ChIP-seq	H3K4me1	lung	e14.5
ENCSR858AUB	ChIP-seq	H3K4me1	lung	e15.5
ENCSR387YSD	ChIP-seq	H3K4me1	lung	e16.5
ENCSR523IIH	ChIP-seq	H3K4me1	lung	p0
ENCSR272GNQ	ChIP-seq	H3K4me1	midbrain	e10.5
ENCSR450ITF	ChIP-seq	H3K4me1	midbrain	e11.5
ENCSR157IVC	ChIP-seq	H3K4me1	midbrain	e12.5
ENCSR253IEG	ChIP-seq	H3K4me1	midbrain	e13.5
ENCSR037HLB	ChIP-seq	H3K4me1	midbrain	e14.5
ENCSR449EUZ	ChIP-seq	H3K4me1	midbrain	e15.5
ENCSR678FIT	ChIP-seq	H3K4me1	midbrain	e16.5
ENCSR391WSS	ChIP-seq	H3K4me1	midbrain	p0
ENCSR448TTC	ChIP-seq	H3K4me1	neural tube	e11.5
ENCSR263CKR	ChIP-seq	H3K4me1	neural tube	e12.5
ENCSR918ZSJ	ChIP-seq	H3K4me1	neural tube	e13.5
ENCSR977DCO	ChIP-seq	H3K4me1	neural tube	e14.5
ENCSR826TJQ	ChIP-seq	H3K4me1	neural tube	e15.5
ENCSR335WME	ChIP-seq	H3K4me1	stomach	e14.5
ENCSR548BKP	ChIP-seq	H3K4me1	stomach	e15.5
ENCSR907CPZ	ChIP-seq	H3K4me1	stomach	e16.5
ENCSR940CMI	ChIP-seq	H3K4me1	stomach	p0
ENCSR406VPQ	ChIP-seq	H3K4me2	embryonic facial prominence	e11.5
ENCSR195NDO	ChIP-seq	H3K4me2	embryonic facial prominence	e12.5
ENCSR758UAI	ChIP-seq	H3K4me2	embryonic facial prominence	e13.5
ENCSR886DWH	ChIP-seq	H3K4me2	embryonic facial prominence	e14.5
ENCSR193AEW	ChIP-seq	H3K4me2	embryonic facial prominence	e15.5
ENCSR067ZDE	ChIP-seq	H3K4me2	forebrain	e11.5
ENCSR782SUW	ChIP-seq	H3K4me2	forebrain	e12.5
ENCSR044SUW	ChIP-seq	H3K4me2	forebrain	e13.5
ENCSR264TXI	ChIP-seq	H3K4me2	forebrain	e14.5
ENCSR402ZLE	ChIP-seq	H3K4me2	forebrain	e15.5
ENCSR462KTT	ChIP-seq	H3K4me2	forebrain	e16.5
ENCSR906UJW	ChIP-seq	H3K4me2	forebrain	p0
ENCSR748BQH	ChIP-seq	H3K4me2	heart	e11.5
ENCSR406KDB	ChIP-seq	H3K4me2	heart	e12.5
ENCSR650UAC	ChIP-seq	H3K4me2	heart	e13.5
ENCSR534HMF	ChIP-seq	H3K4me2	heart	e14.5
ENCSR377RKW	ChIP-seq	H3K4me2	heart	e15.5
ENCSR747VPY	ChIP-seq	H3K4me2	heart	e16.5
ENCSR373OCX	ChIP-seq	H3K4me2	heart	p0
ENCSR323NOC	ChIP-seq	H3K4me2	hindbrain	e11.5
ENCSR537AKT	ChIP-seq	H3K4me2	hindbrain	e12.5
ENCSR947QOH	ChIP-seq	H3K4me2	hindbrain	e13.5
ENCSR234YTN	ChIP-seq	H3K4me2	hindbrain	e14.5
ENCSR831EKS	ChIP-seq	H3K4me2	hindbrain	e15.5
ENCSR161DAW	ChIP-seq	H3K4me2	hindbrain	e16.5
ENCSR771ILS	ChIP-seq	H3K4me2	hindbrain	p0
ENCSR485GTY	ChIP-seq	H3K4me2	intestine	e14.5
ENCSR604AMS	ChIP-seq	H3K4me2	intestine	e15.5
ENCSR100DLL	ChIP-seq	H3K4me2	intestine	e16.5
ENCSR333ZWB	ChIP-seq	H3K4me2	intestine	p0
ENCSR658TDS	ChIP-seq	H3K4me2	kidney	e14.5
ENCSR036YKL	ChIP-seq	H3K4me2	kidney	e15.5
ENCSR846ZTT	ChIP-seq	H3K4me2	kidney	e16.5
ENCSR516TYD	ChIP-seq	H3K4me2	kidney	p0
ENCSR115FTP	ChIP-seq	H3K4me2	limb	e11.5
ENCSR488KVB	ChIP-seq	H3K4me2	limb	e12.5
ENCSR759RVE	ChIP-seq	H3K4me2	limb	e13.5
ENCSR631QAE	ChIP-seq	H3K4me2	limb	e14.5
ENCSR098AHF	ChIP-seq	H3K4me2	limb	e15.5
ENCSR693UWX	ChIP-seq	H3K4me2	liver	e11.5
ENCSR110MSZ	ChIP-seq	H3K4me2	liver	e12.5
ENCSR731OMP	ChIP-seq	H3K4me2	liver	e13.5
ENCSR344BPJ	ChIP-seq	H3K4me2	liver	e14.5
ENCSR258RGT	ChIP-seq	H3K4me2	liver	e15.5
ENCSR458FBL	ChIP-seq	H3K4me2	liver	e16.5
ENCSR578RLI	ChIP-seq	H3K4me2	liver	p0
ENCSR924FJQ	ChIP-seq	H3K4me2	lung	e14.5
ENCSR398TTY	ChIP-seq	H3K4me2	lung	e15.5
ENCSR154DTK	ChIP-seq	H3K4me2	lung	e16.5
ENCSR340VNK	ChIP-seq	H3K4me2	lung	p0
ENCSR261OAK	ChIP-seq	H3K4me2	midbrain	e11.5
ENCSR707DZS	ChIP-seq	H3K4me2	midbrain	e12.5
ENCSR706PSQ	ChIP-seq	H3K4me2	midbrain	e13.5
ENCSR755SGK	ChIP-seq	H3K4me2	midbrain	e14.5
ENCSR525BTK	ChIP-seq	H3K4me2	midbrain	e15.5
ENCSR314FGC	ChIP-seq	H3K4me2	midbrain	e16.5
ENCSR322XHD	ChIP-seq	H3K4me2	midbrain	p0
ENCSR489HYX	ChIP-seq	H3K4me2	neural tube	e11.5
ENCSR370MSK	ChIP-seq	H3K4me2	neural tube	e12.5
ENCSR973AYQ	ChIP-seq	H3K4me2	neural tube	e13.5
ENCSR579RZO	ChIP-seq	H3K4me2	neural tube	e14.5
ENCSR517UZA	ChIP-seq	H3K4me2	neural tube	e15.5
ENCSR076MXH	ChIP-seq	H3K4me2	stomach	e14.5
ENCSR415FLZ	ChIP-seq	H3K4me2	stomach	e15.5
ENCSR282OTI	ChIP-seq	H3K4me2	stomach	e16.5
ENCSR288LNF	ChIP-seq	H3K4me2	stomach	p0
ENCSR765JWZ	ChIP-seq	H3K4me3	embryonic facial prominence	e10.5
ENCSR320CCJ	ChIP-seq	H3K4me3	embryonic facial prominence	e11.5
ENCSR106QSU	ChIP-seq	H3K4me3	embryonic facial prominence	e12.5
ENCSR057BKH	ChIP-seq	H3K4me3	embryonic facial prominence	e13.5
ENCSR059LYY	ChIP-seq	H3K4me3	embryonic facial prominence	e14.5
ENCSR990JMN	ChIP-seq	H3K4me3	embryonic facial prominence	e15.5
ENCSR368RJD	ChIP-seq	H3K4me3	forebrain	e10.5
ENCSR739DVM	ChIP-seq	H3K4me3	forebrain	e11.5
ENCSR527EUE	ChIP-seq	H3K4me3	forebrain	e12.5
ENCSR835BZO	ChIP-seq	H3K4me3	forebrain	e13.5
ENCSR172XOZ	ChIP-seq	H3K4me3	forebrain	e14.5
ENCSR022KDE	ChIP-seq	H3K4me3	forebrain	e15.5
ENCSR129DIK	ChIP-seq	H3K4me3	forebrain	e16.5
ENCSR258YWW	ChIP-seq	H3K4me3	forebrain	p0
ENCSR782DEA	ChIP-seq	H3K4me3	heart	e10.5
ENCSR592GQI	ChIP-seq	H3K4me3	heart	e11.5
ENCSR688ZOR	ChIP-seq	H3K4me3	heart	e12.5
ENCSR501GBJ	ChIP-seq	H3K4me3	heart	e13.5
ENCSR052CDF	ChIP-seq	H3K4me3	heart	e14.5
ENCSR647OTD	ChIP-seq	H3K4me3	heart	e15.5
ENCSR119YTR	ChIP-seq	H3K4me3	heart	e16.5
ENCSR875ZAO	ChIP-seq	H3K4me3	heart	p0
ENCSR731KRE	ChIP-seq	H3K4me3	hindbrain	e10.5
ENCSR928CYU	ChIP-seq	H3K4me3	hindbrain	e11.5
ENCSR158ONM	ChIP-seq	H3K4me3	hindbrain	e12.5
ENCSR315ZEU	ChIP-seq	H3K4me3	hindbrain	e13.5
ENCSR185JBL	ChIP-seq	H3K4me3	hindbrain	e14.5
ENCSR335TVR	ChIP-seq	H3K4me3	hindbrain	e15.5
ENCSR110TIW	ChIP-seq	H3K4me3	hindbrain	e16.5
ENCSR472YGQ	ChIP-seq	H3K4me3	hindbrain	p0
ENCSR464MQU	ChIP-seq	H3K4me3	intestine	e14.5
ENCSR410YIY	ChIP-seq	H3K4me3	intestine	e15.5
ENCSR572KYR	ChIP-seq	H3K4me3	intestine	e16.5
ENCSR198ACZ	ChIP-seq	H3K4me3	intestine	p0
ENCSR669AQL	ChIP-seq	H3K4me3	kidney	e14.5
ENCSR320UJD	ChIP-seq	H3K4me3	kidney	e15.5
ENCSR953HNY	ChIP-seq	H3K4me3	kidney	e16.5
ENCSR536ILV	ChIP-seq	H3K4me3	kidney	p0
ENCSR318QFY	ChIP-seq	H3K4me3	limb	e10.5
ENCSR654VMK	ChIP-seq	H3K4me3	limb	e11.5
ENCSR938MUD	ChIP-seq	H3K4me3	limb	e12.5
ENCSR416OYH	ChIP-seq	H3K4me3	limb	e13.5
ENCSR176BXC	ChIP-seq	H3K4me3	limb	e14.5
ENCSR244ASF	ChIP-seq	H3K4me3	limb	e15.5
ENCSR447DOF	ChIP-seq	H3K4me3	liver	e11.5
ENCSR471SJG	ChIP-seq	H3K4me3	liver	e12.5
ENCSR985UTP	ChIP-seq	H3K4me3	liver	e13.5
ENCSR433ESG	ChIP-seq	H3K4me3	liver	e14.5
ENCSR577SDJ	ChIP-seq	H3K4me3	liver	e15.5
ENCSR252GKD	ChIP-seq	H3K4me3	liver	e16.5
ENCSR653AVN	ChIP-seq	H3K4me3	liver	p0
ENCSR839WFP	ChIP-seq	H3K4me3	lung	e14.5
ENCSR305GII	ChIP-seq	H3K4me3	lung	e15.5
ENCSR295PFM	ChIP-seq	H3K4me3	lung	e16.5
ENCSR262CSU	ChIP-seq	H3K4me3	lung	p0
ENCSR581EJK	ChIP-seq	H3K4me3	midbrain	e10.5
ENCSR283RFW	ChIP-seq	H3K4me3	midbrain	e11.5
ENCSR554TSO	ChIP-seq	H3K4me3	midbrain	e12.5
ENCSR167ZGV	ChIP-seq	H3K4me3	midbrain	e13.5
ENCSR203KIB	ChIP-seq	H3K4me3	midbrain	e14.5
ENCSR486MHP	ChIP-seq	H3K4me3	midbrain	e15.5
ENCSR637CCT	ChIP-seq	H3K4me3	midbrain	e16.5
ENCSR427ZJU	ChIP-seq	H3K4me3	midbrain	p0
ENCSR427OZM	ChIP-seq	H3K4me3	neural tube	e11.5
ENCSR538SRO	ChIP-seq	H3K4me3	neural tube	e12.5
ENCSR704IWS	ChIP-seq	H3K4me3	neural tube	e13.5
ENCSR093BYV	ChIP-seq	H3K4me3	neural tube	e14.5
ENCSR044SNE	ChIP-seq	H3K4me3	neural tube	e15.5
ENCSR023VJO	ChIP-seq	H3K4me3	stomach	e14.5
ENCSR522LXN	ChIP-seq	H3K4me3	stomach	e15.5
ENCSR684UWM	ChIP-seq	H3K4me3	stomach	e16.5
ENCSR916CBN	ChIP-seq	H3K4me3	stomach	p0
ENCSR076FAM	ChIP-seq	H3K9ac	embryonic facial prominence	e11.5
ENCSR105OGF	ChIP-seq	H3K9ac	embryonic facial prominence	e12.5
ENCSR780NWL	ChIP-seq	H3K9ac	embryonic facial prominence	e13.5
ENCSR964RRJ	ChIP-seq	H3K9ac	embryonic facial prominence	e14.5
ENCSR755PMX	ChIP-seq	H3K9ac	embryonic facial prominence	e15.5
ENCSR400TGE	ChIP-seq	H3K9ac	forebrain	e11.5
ENCSR161UUY	ChIP-seq	H3K9ac	forebrain	e12.5
ENCSR373TMR	ChIP-seq	H3K9ac	forebrain	e13.5
ENCSR128ZCB	ChIP-seq	H3K9ac	forebrain	e14.5
ENCSR717XCU	ChIP-seq	H3K9ac	forebrain	e15.5
ENCSR014TEJ	ChIP-seq	H3K9ac	forebrain	e16.5
ENCSR369RBO	ChIP-seq	H3K9ac	forebrain	p0
ENCSR751HEG	ChIP-seq	H3K9ac	heart	e11.5
ENCSR968NPX	ChIP-seq	H3K9ac	heart	e12.5
ENCSR069XHI	ChIP-seq	H3K9ac	heart	e13.5
ENCSR345RKE	ChIP-seq	H3K9ac	heart	e14.5
ENCSR956ZCG	ChIP-seq	H3K9ac	heart	e15.5
ENCSR373LNE	ChIP-seq	H3K9ac	heart	e16.5
ENCSR519DNE	ChIP-seq	H3K9ac	heart	p0
ENCSR734IEL	ChIP-seq	H3K9ac	hindbrain	e11.5
ENCSR576XBN	ChIP-seq	H3K9ac	hindbrain	e12.5
ENCSR190RKJ	ChIP-seq	H3K9ac	hindbrain	e13.5
ENCSR186PIV	ChIP-seq	H3K9ac	hindbrain	e14.5
ENCSR639KSW	ChIP-seq	H3K9ac	hindbrain	e15.5
ENCSR718CAJ	ChIP-seq	H3K9ac	hindbrain	e16.5
ENCSR721MSV	ChIP-seq	H3K9ac	hindbrain	p0
ENCSR260OUP	ChIP-seq	H3K9ac	intestine	e14.5
ENCSR412ODT	ChIP-seq	H3K9ac	intestine	e15.5
ENCSR749PZB	ChIP-seq	H3K9ac	intestine	e16.5
ENCSR946RLM	ChIP-seq	H3K9ac	intestine	p0
ENCSR569UCG	ChIP-seq	H3K9ac	kidney	e14.5
ENCSR961PNM	ChIP-seq	H3K9ac	kidney	e15.5
ENCSR912IXU	ChIP-seq	H3K9ac	kidney	e16.5
ENCSR288OHO	ChIP-seq	H3K9ac	kidney	p0
ENCSR286IGS	ChIP-seq	H3K9ac	limb	e11.5
ENCSR629AFL	ChIP-seq	H3K9ac	limb	e12.5
ENCSR462BZP	ChIP-seq	H3K9ac	limb	e13.5
ENCSR274ACJ	ChIP-seq	H3K9ac	limb	e14.5
ENCSR332UCY	ChIP-seq	H3K9ac	limb	e15.5
ENCSR948RYN	ChIP-seq	H3K9ac	liver	e11.5
ENCSR607HIQ	ChIP-seq	H3K9ac	liver	e12.5
ENCSR868FWZ	ChIP-seq	H3K9ac	liver	e13.5
ENCSR898WIS	ChIP-seq	H3K9ac	liver	e14.5
ENCSR889MYY	ChIP-seq	H3K9ac	liver	e15.5
ENCSR795UOC	ChIP-seq	H3K9ac	liver	e16.5
ENCSR966RAG	ChIP-seq	H3K9ac	liver	p0
ENCSR249AUA	ChIP-seq	H3K9ac	lung	e14.5
ENCSR744LCN	ChIP-seq	H3K9ac	lung	e15.5
ENCSR430JWT	ChIP-seq	H3K9ac	lung	e16.5
ENCSR356LBC	ChIP-seq	H3K9ac	lung	p0
ENCSR502WUI	ChIP-seq	H3K9ac	midbrain	e11.5
ENCSR312BOK	ChIP-seq	H3K9ac	midbrain	e12.5
ENCSR286OKN	ChIP-seq	H3K9ac	midbrain	e13.5
ENCSR067FKP	ChIP-seq	H3K9ac	midbrain	e14.5
ENCSR347BFO	ChIP-seq	H3K9ac	midbrain	e15.5
ENCSR068XYW	ChIP-seq	H3K9ac	midbrain	e16.5
ENCSR028VCU	ChIP-seq	H3K9ac	midbrain	p0
ENCSR547PLI	ChIP-seq	H3K9ac	neural tube	e11.5
ENCSR065CJC	ChIP-seq	H3K9ac	neural tube	e12.5
ENCSR087PLZ	ChIP-seq	H3K9ac	neural tube	e13.5
ENCSR511LWL	ChIP-seq	H3K9ac	neural tube	e14.5
ENCSR571HOT	ChIP-seq	H3K9ac	neural tube	e15.5
ENCSR293ORS	ChIP-seq	H3K9ac	stomach	e14.5
ENCSR483DEV	ChIP-seq	H3K9ac	stomach	e15.5
ENCSR798VHN	ChIP-seq	H3K9ac	stomach	e16.5
ENCSR048IZJ	ChIP-seq	H3K9ac	stomach	p0
ENCSR779MSI	ChIP-seq	H3K9me3	embryonic facial prominence	e10.5
ENCSR526JRI	ChIP-seq	H3K9me3	embryonic facial prominence	e11.5
ENCSR316AZB	ChIP-seq	H3K9me3	embryonic facial prominence	e12.5
ENCSR147PYG	ChIP-seq	H3K9me3	embryonic facial prominence	e13.5
ENCSR706SZI	ChIP-seq	H3K9me3	embryonic facial prominence	e14.5
ENCSR137NUN	ChIP-seq	H3K9me3	embryonic facial prominence	e15.5
ENCSR737JHU	ChIP-seq	H3K9me3	forebrain	e10.5
ENCSR894JAS	ChIP-seq	H3K9me3	forebrain	e11.5
ENCSR634GFJ	ChIP-seq	H3K9me3	forebrain	e12.5
ENCSR041KEJ	ChIP-seq	H3K9me3	forebrain	e13.5
ENCSR270WWV	ChIP-seq	H3K9me3	forebrain	e14.5
ENCSR668BBX	ChIP-seq	H3K9me3	forebrain	e15.5
ENCSR352NVU	ChIP-seq	H3K9me3	forebrain	e16.5
ENCSR093DWU	ChIP-seq	H3K9me3	forebrain	p0
ENCSR455REA	ChIP-seq	H3K9me3	heart	e10.5
ENCSR463GJL	ChIP-seq	H3K9me3	heart	e11.5
ENCSR557SVH	ChIP-seq	H3K9me3	heart	e12.5
ENCSR098USP	ChIP-seq	H3K9me3	heart	e13.5
ENCSR007XTC	ChIP-seq	H3K9me3	heart	e14.5
ENCSR071SQK	ChIP-seq	H3K9me3	heart	e15.5
ENCSR122CJZ	ChIP-seq	H3K9me3	heart	e16.5
ENCSR965JWF	ChIP-seq	H3K9me3	heart	p0
ENCSR703TBR	ChIP-seq	H3K9me3	hindbrain	e10.5
ENCSR299NCJ	ChIP-seq	H3K9me3	hindbrain	e11.5
ENCSR972LUE	ChIP-seq	H3K9me3	hindbrain	e12.5
ENCSR325JLI	ChIP-seq	H3K9me3	hindbrain	e13.5
ENCSR689NXE	ChIP-seq	H3K9me3	hindbrain	e14.5
ENCSR299DRH	ChIP-seq	H3K9me3	hindbrain	e15.5
ENCSR427ZQB	ChIP-seq	H3K9me3	hindbrain	e16.5
ENCSR365CUP	ChIP-seq	H3K9me3	hindbrain	p0
ENCSR698WCJ	ChIP-seq	H3K9me3	intestine	e14.5
ENCSR311VKI	ChIP-seq	H3K9me3	intestine	e15.5
ENCSR358XYP	ChIP-seq	H3K9me3	intestine	e16.5
ENCSR672UQX	ChIP-seq	H3K9me3	intestine	p0
ENCSR405TGI	ChIP-seq	H3K9me3	kidney	e14.5
ENCSR499NUH	ChIP-seq	H3K9me3	kidney	e15.5
ENCSR821GHK	ChIP-seq	H3K9me3	kidney	e16.5
ENCSR498EVD	ChIP-seq	H3K9me3	kidney	p0
ENCSR890ACP	ChIP-seq	H3K9me3	limb	e10.5
ENCSR961MEP	ChIP-seq	H3K9me3	limb	e11.5
ENCSR943QUH	ChIP-seq	H3K9me3	limb	e12.5
ENCSR022DED	ChIP-seq	H3K9me3	limb	e13.5
ENCSR333QJO	ChIP-seq	H3K9me3	limb	e14.5
ENCSR028ZHS	ChIP-seq	H3K9me3	limb	e15.5
ENCSR846ZCW	ChIP-seq	H3K9me3	liver	e11.5
ENCSR149GYK	ChIP-seq	H3K9me3	liver	e12.5
ENCSR191XHV	ChIP-seq	H3K9me3	liver	e13.5
ENCSR125VVG	ChIP-seq	H3K9me3	liver	e14.5
ENCSR855NKG	ChIP-seq	H3K9me3	liver	e15.5
ENCSR095FDG	ChIP-seq	H3K9me3	liver	e16.5
ENCSR341XCL	ChIP-seq	H3K9me3	liver	p0
ENCSR311LZM	ChIP-seq	H3K9me3	lung	e14.5
ENCSR773EGV	ChIP-seq	H3K9me3	lung	e15.5
ENCSR579UVB	ChIP-seq	H3K9me3	lung	e16.5
ENCSR238ZCJ	ChIP-seq	H3K9me3	lung	p0
ENCSR769ITO	ChIP-seq	H3K9me3	midbrain	e10.5
ENCSR311TLE	ChIP-seq	H3K9me3	midbrain	e11.5
ENCSR765UOU	ChIP-seq	H3K9me3	midbrain	e12.5
ENCSR754AXU	ChIP-seq	H3K9me3	midbrain	e13.5
ENCSR948VPV	ChIP-seq	H3K9me3	midbrain	e14.5
ENCSR864DSI	ChIP-seq	H3K9me3	midbrain	e15.5
ENCSR571WQI	ChIP-seq	H3K9me3	midbrain	e16.5
ENCSR065LAB	ChIP-seq	H3K9me3	midbrain	p0
ENCSR466ZQC	ChIP-seq	H3K9me3	neural tube	e11.5
ENCSR930AFR	ChIP-seq	H3K9me3	neural tube	e12.5
ENCSR345HNA	ChIP-seq	H3K9me3	neural tube	e13.5
ENCSR223FDX	ChIP-seq	H3K9me3	neural tube	e14.5
ENCSR549RVJ	ChIP-seq	H3K9me3	neural tube	e15.5
ENCSR976GSO	ChIP-seq	H3K9me3	stomach	e14.5
ENCSR975QEX	ChIP-seq	H3K9me3	stomach	e15.5
ENCSR630AOU	ChIP-seq	H3K9me3	stomach	e16.5
ENCSR556DLJ	ChIP-seq	H3K9me3	stomach	p0
ENCSR682UEM	ChIP-seq	input_control	embryonic facial prominence	e10.5
ENCSR068AQC	ChIP-seq	input_control	embryonic facial prominence	e11.5
ENCSR445HBA	ChIP-seq	input_control	embryonic facial prominence	e12.5
ENCSR742ZUI	ChIP-seq	input_control	embryonic facial prominence	e13.5
ENCSR329ZEN	ChIP-seq	input_control	embryonic facial prominence	e14.5
ENCSR981PSX	ChIP-seq	input_control	embryonic facial prominence	e15.5
ENCSR776WPN	ChIP-seq	input_control	forebrain	e10.5
ENCSR024JAN	ChIP-seq	input_control	forebrain	e11.5
ENCSR523QKO	ChIP-seq	input_control	forebrain	e12.5
ENCSR583ZEV	ChIP-seq	input_control	forebrain	e13.5
ENCSR244YQD	ChIP-seq	input_control	forebrain	e14.5
ENCSR880HDV	ChIP-seq	input_control	forebrain	e15.5
ENCSR587JRQ	ChIP-seq	input_control	forebrain	e16.5
ENCSR398NCK	ChIP-seq	input_control	forebrain	p0
ENCSR681NQF	ChIP-seq	input_control	heart	e10.5
ENCSR317ENO	ChIP-seq	input_control	heart	e11.5
ENCSR646GHA	ChIP-seq	input_control	heart	e12.5
ENCSR077QRY	ChIP-seq	input_control	heart	e13.5
ENCSR840PFW	ChIP-seq	input_control	heart	e14.5
ENCSR424WHM	ChIP-seq	input_control	heart	e15.5
ENCSR685AMF	ChIP-seq	input_control	heart	e16.5
ENCSR334IOH	ChIP-seq	input_control	heart	p0
ENCSR191XBS	ChIP-seq	input_control	hindbrain	e10.5
ENCSR563WKD	ChIP-seq	input_control	hindbrain	e11.5
ENCSR659EZI	ChIP-seq	input_control	hindbrain	e12.5
ENCSR545RUT	ChIP-seq	input_control	hindbrain	e13.5
ENCSR896PWV	ChIP-seq	input_control	hindbrain	e14.5
ENCSR685UUM	ChIP-seq	input_control	hindbrain	e15.5
ENCSR752KDM	ChIP-seq	input_control	hindbrain	e16.5
ENCSR066SPF	ChIP-seq	input_control	hindbrain	p0
ENCSR645QSY	ChIP-seq	input_control	intestine	e14.5
ENCSR872UEE	ChIP-seq	input_control	intestine	e15.5
ENCSR635JIC	ChIP-seq	input_control	intestine	e16.5
ENCSR898PML	ChIP-seq	input_control	intestine	p0
ENCSR091DHJ	ChIP-seq	input_control	kidney	e14.5
ENCSR780JSE	ChIP-seq	input_control	kidney	e15.5
ENCSR642DUV	ChIP-seq	input_control	kidney	e16.5
ENCSR178MLS	ChIP-seq	input_control	kidney	p0
ENCSR687ALB	ChIP-seq	input_control	limb	e10.5
ENCSR949ZLW	ChIP-seq	input_control	limb	e11.5
ENCSR218CUA	ChIP-seq	input_control	limb	e12.5
ENCSR465WTL	ChIP-seq	input_control	limb	e13.5
ENCSR232EOO	ChIP-seq	input_control	limb	e14.5
ENCSR070OXL	ChIP-seq	input_control	limb	e15.5
ENCSR573MJR	ChIP-seq	input_control	liver	e11.5
ENCSR680ZSE	ChIP-seq	input_control	liver	e12.5
ENCSR220PXJ	ChIP-seq	input_control	liver	e13.5
ENCSR742WLX	ChIP-seq	input_control	liver	e14.5
ENCSR274AQL	ChIP-seq	input_control	liver	e15.5
ENCSR082JEN	ChIP-seq	input_control	liver	e16.5
ENCSR617RDY	ChIP-seq	input_control	liver	p0
ENCSR280SYC	ChIP-seq	input_control	lung	e14.5
ENCSR371AKO	ChIP-seq	input_control	lung	e15.5
ENCSR559FAB	ChIP-seq	input_control	lung	e16.5
ENCSR241RIG	ChIP-seq	input_control	lung	p0
ENCSR842LMA	ChIP-seq	input_control	midbrain	e10.5
ENCSR081UQY	ChIP-seq	input_control	midbrain	e11.5
ENCSR415FCU	ChIP-seq	input_control	midbrain	e12.5
ENCSR359ETU	ChIP-seq	input_control	midbrain	e13.5
ENCSR413VHH	ChIP-seq	input_control	midbrain	e14.5
ENCSR748XBE	ChIP-seq	input_control	midbrain	e15.5
ENCSR817FFF	ChIP-seq	input_control	midbrain	e16.5
ENCSR889XXJ	ChIP-seq	input_control	midbrain	p0
ENCSR138YZB	ChIP-seq	input_control	neural tube	e11.5
ENCSR991FSR	ChIP-seq	input_control	neural tube	e12.5
ENCSR295GGT	ChIP-seq	input_control	neural tube	e13.5
ENCSR254WNU	ChIP-seq	input_control	neural tube	e14.5
ENCSR351BDM	ChIP-seq	input_control	neural tube	e15.5
ENCSR497YBQ	ChIP-seq	input_control	stomach	e14.5
ENCSR240XQT	ChIP-seq	input_control	stomach	e15.5
ENCSR012BVY	ChIP-seq	input_control	stomach	e16.5
ENCSR050VUZ	ChIP-seq	input_control	stomach	p0
ENCSR150RMQ	ATAC-seq	NA	embryonic facial prominence	e11.5
ENCSR031HDN	ATAC-seq	NA	embryonic facial prominence	e12.5
ENCSR358MOW	ATAC-seq	NA	embryonic facial prominence	e13.5
ENCSR876SYO	ATAC-seq	NA	embryonic facial prominence	e14.5
ENCSR261ICG	ATAC-seq	NA	embryonic facial prominence	e15.5
ENCSR273UFV	ATAC-seq	NA	forebrain	e11.5
ENCSR559FAJ	ATAC-seq	NA	forebrain	e12.5
ENCSR903GMO	ATAC-seq	NA	forebrain	e13.5
ENCSR810HQR	ATAC-seq	NA	forebrain	e14.5
ENCSR976LWP	ATAC-seq	NA	forebrain	e15.5
ENCSR836PUC	ATAC-seq	NA	forebrain	e16.5
ENCSR310MLB	ATAC-seq	NA	forebrain	p0
ENCSR820ACB	ATAC-seq	NA	heart	e11.5
ENCSR652CNN	ATAC-seq	NA	heart	e12.5
ENCSR552ABC	ATAC-seq	NA	heart	e13.5
ENCSR068YGC	ATAC-seq	NA	heart	e14.5
ENCSR603MWL	ATAC-seq	NA	heart	e15.5
ENCSR371KFW	ATAC-seq	NA	heart	e16.5
ENCSR451NAE	ATAC-seq	NA	heart	p0
ENCSR012YAB	ATAC-seq	NA	hindbrain	e11.5
ENCSR088UYE	ATAC-seq	NA	hindbrain	e12.5
ENCSR176BYZ	ATAC-seq	NA	hindbrain	e13.5
ENCSR798FDL	ATAC-seq	NA	hindbrain	e14.5
ENCSR662KNY	ATAC-seq	NA	hindbrain	e15.5
ENCSR623GSD	ATAC-seq	NA	hindbrain	e16.5
ENCSR312LQX	ATAC-seq	NA	hindbrain	p0
ENCSR150EOO	ATAC-seq	NA	intestine	e14.5
ENCSR961SMM	ATAC-seq	NA	intestine	e15.5
ENCSR966ORC	ATAC-seq	NA	intestine	e16.5
ENCSR079GOY	ATAC-seq	NA	intestine	p0
ENCSR758IRM	ATAC-seq	NA	kidney	e14.5
ENCSR023QZX	ATAC-seq	NA	kidney	e15.5
ENCSR732OTZ	ATAC-seq	NA	kidney	e16.5
ENCSR389CLN	ATAC-seq	NA	kidney	p0
ENCSR377YDY	ATAC-seq	NA	limb	e11.5
ENCSR551WBK	ATAC-seq	NA	limb	e12.5
ENCSR896XIN	ATAC-seq	NA	limb	e13.5
ENCSR460BUL	ATAC-seq	NA	limb	e14.5
ENCSR204ZTY	ATAC-seq	NA	limb	e15.5
ENCSR785NEL	ATAC-seq	NA	liver	e11.5
ENCSR302LIV	ATAC-seq	NA	liver	e12.5
ENCSR343TXK	ATAC-seq	NA	liver	e13.5
ENCSR032HKE	ATAC-seq	NA	liver	e14.5
ENCSR465PYP	ATAC-seq	NA	liver	e15.5
ENCSR255XTC	ATAC-seq	NA	liver	e16.5
ENCSR609OHJ	ATAC-seq	NA	liver	p0
ENCSR335VJW	ATAC-seq	NA	lung	e14.5
ENCSR668EIA	ATAC-seq	NA	lung	e15.5
ENCSR627OCR	ATAC-seq	NA	lung	e16.5
ENCSR102NGD	ATAC-seq	NA	lung	p0
ENCSR382RUC	ATAC-seq	NA	midbrain	e11.5
ENCSR154BXN	ATAC-seq	NA	midbrain	e12.5
ENCSR819QOJ	ATAC-seq	NA	midbrain	e13.5
ENCSR384JBF	ATAC-seq	NA	midbrain	e14.5
ENCSR468GUI	ATAC-seq	NA	midbrain	e15.5
ENCSR096JCC	ATAC-seq	NA	midbrain	e16.5
ENCSR211OCS	ATAC-seq	NA	midbrain	p0
ENCSR282YTE	ATAC-seq	NA	neural tube	e11.5
ENCSR690VOH	ATAC-seq	NA	neural tube	e12.5
ENCSR217NOA	ATAC-seq	NA	neural tube	e13.5
ENCSR700QBR	ATAC-seq	NA	neural tube	e14.5
ENCSR983JWA	ATAC-seq	NA	neural tube	e15.5
ENCSR618HDK	ATAC-seq	NA	stomach	e14.5
ENCSR486XAS	ATAC-seq	NA	stomach	e15.5
ENCSR363SKQ	ATAC-seq	NA	stomach	e16.5
ENCSR597BGP	ATAC-seq	NA	stomach	p0
